# Supplementary material for: Substituting physicians with nurse practitioners, physician assistants or nurses in nursing homes: protocol for a realist evaluation case study
Source: PubMed Central journal article supplement — BMJ Open. 2017 Jun 8;7(6):e015134. doi: 10.1136/bmjopen-2016-015134 (PMC5734255; doi:10.1136/bmjopen-2016-015134), 2017-06-08
Supplement: bmjopen-2016-015134.draft_revisions.pdf [file bmjopen-2016-015134.draft_revisions.pdf]

# BMJ Open

## Substituting physicians with nurse practitioners, physician assistants or nurses in nursing homes – protocol for a case study

|                                 |                                                                                                                                                                                                                                                                                                                                                                                                                                                                                                                                                                                                                                                                                                                                                                                                                                                    |
|---------------------------------|----------------------------------------------------------------------------------------------------------------------------------------------------------------------------------------------------------------------------------------------------------------------------------------------------------------------------------------------------------------------------------------------------------------------------------------------------------------------------------------------------------------------------------------------------------------------------------------------------------------------------------------------------------------------------------------------------------------------------------------------------------------------------------------------------------------------------------------------------|
| Journal:                        | <i>BMJ Open</i>                                                                                                                                                                                                                                                                                                                                                                                                                                                                                                                                                                                                                                                                                                                                                                                                                                    |
| Manuscript ID                   | bmjopen-2016-015134                                                                                                                                                                                                                                                                                                                                                                                                                                                                                                                                                                                                                                                                                                                                                                                                                                |
| Article Type:                   | Protocol                                                                                                                                                                                                                                                                                                                                                                                                                                                                                                                                                                                                                                                                                                                                                                                                                                           |
| Date Submitted by the Author:   | 11-Nov-2016                                                                                                                                                                                                                                                                                                                                                                                                                                                                                                                                                                                                                                                                                                                                                                                                                                        |
| Complete List of Authors:       | Lovink, Marleen; Radboud university medical center, Scientific Center for Quality of Healthcare (IQ healthcare)<br>Persoon, Anke; Radboud university medical center, Department of Primary and Community Care<br>van Vught, Anneke; HAN University of Applied Sciences, Faculty of Health and Social Studies<br>Schoonhoven, Lisette; University of Southampton, Faculty of Health Sciences; Radboud university medical center, Scientific Center for Quality of Healthcare (IQ healthcare)<br>Koopmans, Raymond; Radboud university medical center, Department of Primary and Community Care; Joachim & Anna, Center for Specialized Geriatric Care<br>Laurant, Miranda; Radboud university medical center, Scientific Center for Quality of Healthcare (IQ healthcare); HAN University of Applied Sciences, Faculty of Health and Social Studies |
| <b>Primary Subject Heading</b>: | Geriatric medicine                                                                                                                                                                                                                                                                                                                                                                                                                                                                                                                                                                                                                                                                                                                                                                                                                                 |
| Secondary Subject Heading:      | Qualitative research, Nursing                                                                                                                                                                                                                                                                                                                                                                                                                                                                                                                                                                                                                                                                                                                                                                                                                      |
| Keywords:                       | GERIATRIC MEDICINE, nurse practitioner, physician assistant, nursing home, substitution                                                                                                                                                                                                                                                                                                                                                                                                                                                                                                                                                                                                                                                                                                                                                            |
|                                 |                                                                                                                                                                                                                                                                                                                                                                                                                                                                                                                                                                                                                                                                                                                                                                                                                                                    |

SCHOLARONE™  
Manuscripts

1  
2  
3 **Substituting physicians with nurse practitioners, physician assistants or nurses in nursing**  
4 **homes – protocol for a case study**  
5  
6

7 **Authors**

8 Marleen H. Lovink, Anke Persoon, Anneke J.A.H. van Vught, Lisette Schoonhoven, Raymond T.C.M.  
9 Koopmans, Miranda G.H. Laurant  
10

11  
12 **Corresponding author**

13 Marleen H. Lovink, RN MSc, PhD student  
14 Radboud university medical center, Radboud Institute for Health Sciences, Scientific Center for Quality  
15 of Healthcare (IQ healthcare), P.O. box 9101, 114, 6500 HB, Nijmegen, the Netherlands  
16  
17 Email: [Marleen.lovink@radboudumc.nl](mailto:Marleen.lovink@radboudumc.nl)  
18  
19 Telephone: +31243666873  
20  
21

22 **Co-authors**

23 Anke Persoon, RN PhD, senior researcher  
24 Radboud university medical center, Radboud Institute for Health Sciences, Department of Primary and  
25 Community Care, the Netherlands  
26  
27 [anke.persoon@radboudumc.nl](mailto:anke.persoon@radboudumc.nl)  
28  
29

30 Anneke (J.A.H.) van Vught, PhD, associate professor  
31 HAN University of Applied Sciences, Faculty of Health and Social Studies, Nijmegen, the Netherlands  
32  
33 [a.vanvught@han.nl](mailto:a.vanvught@han.nl)  
34  
35

36 Lisette Schoonhoven, PhD, professor of nursing and visiting professor  
37 University of Southampton, Faculty of Health Sciences, Southampton, UK  
38  
39 and Radboud university medical center, Radboud Institute for Health Sciences, Scientific Center for  
40 Quality of Healthcare (IQ healthcare), Nijmegen, the Netherlands  
41  
42 [l.schoonhoven@soton.ac.uk](mailto:l.schoonhoven@soton.ac.uk)  
43  
44

45 Raymond T.C.M. Koopmans, PhD, professor in elderly care medicine, especially long-term care  
46 Radboud university medical center, Radboud Institute for Health Sciences, Department of Primary and  
47 Community Care, Nijmegen, the Netherlands  
48  
49 and Joachim & Anna, Center for Specialized Geriatric Care, Nijmegen, the Netherlands  
50  
51 [raymond.koopmans@radboudumc.nl](mailto:raymond.koopmans@radboudumc.nl)  
52

53 Miranda G.H. Laurant, PhD, senior researcher and professor organization of care and services  
54 Radboud university medical center, Radboud Institute for Health Sciences, Scientific Center for Quality  
55 of Healthcare (IQ healthcare), Nijmegen, the Netherlands  
56  
57  
58  
59  
60

1  
2  
3 and HAN University of Applied Sciences, Faculty of Health and Social Studies, Nijmegen, the  
4 Netherlands

5 [miranda.laurant@radboudumc.nl](mailto:miranda.laurant@radboudumc.nl)  
6  
7

8 Keywords: case study, nursing home, nurse practitioner, physician assistant, substitution  
9

10  
11 Word count: 6465  
12  
13  
14  
15  
16  
17  
18  
19  
20  
21  
22  
23  
24  
25  
26  
27  
28  
29  
30  
31  
32  
33  
34  
35  
36  
37  
38  
39  
40  
41  
42  
43  
44  
45  
46  
47  
48  
49  
50  
51  
52  
53  
54  
55  
56  
57  
58  
59  
60

For peer review only

**Abstract****Introduction**

In developed countries, substituting physicians with nurse practitioners, physician assistants and nurses (physician substitution) occurs in nursing homes as an answer to the challenges related to the ageing population and the shortage of staff, as well as to guarantee the quality of nursing home care. However, there is great diversity in how physician substitution in nursing homes is modelled and it is unknown how it can best contribute to the quality of healthcare. This study aims to gain insight into how physician substitution is modelled, and whether it contributes to perceived quality of healthcare. Second, this study aims to provide insight into the elements of physician substitution that contribute to quality of healthcare.

**Methods and analysis**

This study will use a multiple-case study design that draws upon realist evaluation principles. The realist evaluation is based on four concepts for explaining and understanding interventions: context, mechanism, outcome, and context-mechanism-outcome configuration. The following steps will be taken: 1. Developing a theory; 2. Conducting seven case studies; 3. Analysing outcome patterns after each case and a cross-case analysis at the end; 4. Revising the initial theory.

**Ethics and dissemination**

The research ethics committee of the region Arnhem Nijmegen in the Netherlands concluded that this study does not fall within the scope of the Medical Research Involving Human Subjects Act (WMO) (registration number 2015/1914). Before the start of the study, the Board of Directors of the nursing home organisations will be informed verbally and by letter and will also be asked for informed consent. In addition, all participants will be informed verbally and by letter and will be asked for informed consent. Findings will be disseminated by publication in a peer-reviewed journal, international and national conferences, national professional associations and policy partners in national government.

**Strengths and limitations of this study**

- This is the first case study applying a realist evaluation approach in seven cases to gain insight into what mechanism of substituting physicians with nurse practitioners, physician assistants or nurses in nursing homes contributes, in what context and in what respect, to perceived quality of healthcare.
- This case study will build on a theory based on a literature and a focus group study conducted by the research team; the theory is presented in this article.
- All relevant stakeholders involved in physician substitution will be included and different data collection methods will be applied to provide a complete picture of each case which will be input for the cross-case analysis.
- This protocol may guide other researchers in conducting their multiple-case study according to realist evaluation principles.
- Seven cases will be included in this case study; therefore it might be that not all possible ways of modeling physician substitution in nursing homes are included.

## INTRODUCTION

Maintaining the quality of nursing home care in light of the ageing population and the shortages of staff is an important issue in developed countries. Physician substitution is one of the potential solutions used by nursing homes to deal with these challenges.<sup>1-3</sup> However, there is great diversity in how physician substitution in nursing homes is modelled and it is unknown how it can be done best to contribute the most to the quality of healthcare [Lovink et al. in preparation].

Physician substitution means shifting care from physicians to nurse practitioners (NPs), physician assistants (PAs), or registered nurses (RNs), also called mid-level providers. We use the term mid-level providers to refer to professionals with European Qualification Level five or higher.<sup>4</sup> Their introduction in nursing homes has happened for several reasons.

- 1) The population is ageing and in this ageing population, the prevalence of (chronic) diseases and multi-morbidity is also expected to increase.<sup>5</sup>
- 2) Societal reforms have shifted healthcare from the hospitals and nursing homes to the community.<sup>6</sup> This means that only patients requiring complex care will reside in nursing homes. As a consequence, attending physicians in nursing homes face heavy workloads.<sup>7</sup> In the Netherlands, nursing home physician specialists, called elderly care physicians (ECPs), are employed by the nursing home organisation.<sup>8-9</sup> This is a unique specialty that may contribute to the quality of healthcare.<sup>8-10-11</sup> However, there is also a high workload for ECPs in the Netherlands, and there are many vacancies.<sup>12</sup>
- 3) Relatively few medical students are pursuing careers in healthcare for older people.<sup>12-15</sup> By substituting physicians with mid-level providers, these threats to the quality of healthcare may be diminished.<sup>2</sup>

A systematic literature review showed that substituting physicians with mid-level providers in nursing homes appeared to achieve patient outcomes and process of care outcomes that were at least as good as care provided by physicians only.<sup>16</sup> In addition, a focus group study with care providers of Dutch nursing homes showed that mid-level providers not only substituted for the physicians, but that they had a surplus value, according to the respondents, because they contributed to quality of healthcare, provided patient-centered care and strengthened the care team [Lovink et al. in preparation]. However, the same study showed that there was great diversity in how physician substitution was modelled and there was no consensus on the optimal way to model physician substitution. Moreover, the results of this focus group study may be distorted by social desirability bias due to self reporting of activities [Lovink et al. in preparation]. To gain a more complete and in-depth insight into physician substitution in nursing homes, a multiple-case study will be carried out in seven nursing homes in the Netherlands. This paper describes the study protocol.

### Study aim

The aim of the study is to gain insight into how substitution of ECPs by mid-level providers is modelled, and whether it contributes to perceived quality of healthcare. Second, we aim to provide

1  
2  
3 insight into elements of substitution of ECPs by mid-level providers that contribute to quality of  
4 healthcare (i.e. elements that contribute to an optimal model of physician substitution). In order to do  
5 so, the following research questions will be answered:  
6  
7

8 Research questions:

- 9  
10
- How is substitution of ECPs by mid-level providers modelled in different nursing homes?
  - What mechanism of substitution of ECPs by mid-level providers contributes, in what context and in what respect, to perceived quality of healthcare for nursing home patients?
  - What are elements that contribute to an optimal model of substitution of ECPs by mid-level providers?
- 11  
12  
13  
14  
15  
16  
17

## 18 DESIGN

19 The study will use a descriptive and partial explanatory multiple-case study design that draws upon  
20 realist evaluation principles.<sup>17 18</sup> The realist evaluation is useful for studying complex interventions  
21 when the aim of the study is not determining whether an intervention is effective or not, but instead to  
22 explain how and why it is effective, under what conditions, and for which groups of patients.<sup>19</sup> The  
23 realist evaluation is based on four concepts for explaining and understanding interventions: context  
24 (C), mechanism (M), outcome (O), and the context-mechanism-outcome (CMO) configuration. The  
25 realist evaluation is a pragmatic alternative to the experimental paradigm, given the impossibility of  
26 controlling complex interventions, such as physician substitution.<sup>19</sup> The following steps will be taken in  
27 this study:  
28  
29  
30  
31

1. Developing an initial theory (see below)
  2. Conducting seven case studies (collecting data on (appropriate) contexts, mechanisms and outcomes)
  3. Analysing outcome patterns after each case and a cross-case analysis at the end to see which can and which cannot be explained by the initial theory
  4. Revising understanding of CMO-configurations as a prelude to a further theory refinement.
- 32  
33  
34  
35  
36  
37  
38  
39  
40  
41

## 42 INITIAL THEORY SUBSTITUTION

43 In the following paragraphs, a theory of substitution of ECPs by mid-level providers in nursing homes  
44 will be presented according to the concepts of the realist evaluation.<sup>18</sup> Realist evaluation starts with  
45 eliciting and formalizing the theory to be tested. In addition, data will be collected and analysed, and  
46 the theory will be tested.<sup>19</sup> The initial theory presented is partly based on literature and partly on a  
47 focus group study we performed [Lovink et. al. in preparation]. In the focus group study, ECPs, NPs,  
48 PAs, and RNs (in total, 35 care providers) working in Dutch nursing homes were interviewed about the  
49 topic of physician substitution. The theory is a preliminary theory that will be adjusted and further  
50 developed in this case study. Below, it is presented under the headings Mechanisms, Contexts and  
51 Outcomes, starting with the heading Mechanisms, as this is the core of CMO-configurations. This  
52 theory (depicted in Figure 1) will be the starting point for the case study.  
53  
54  
55  
56  
57  
58  
59  
60

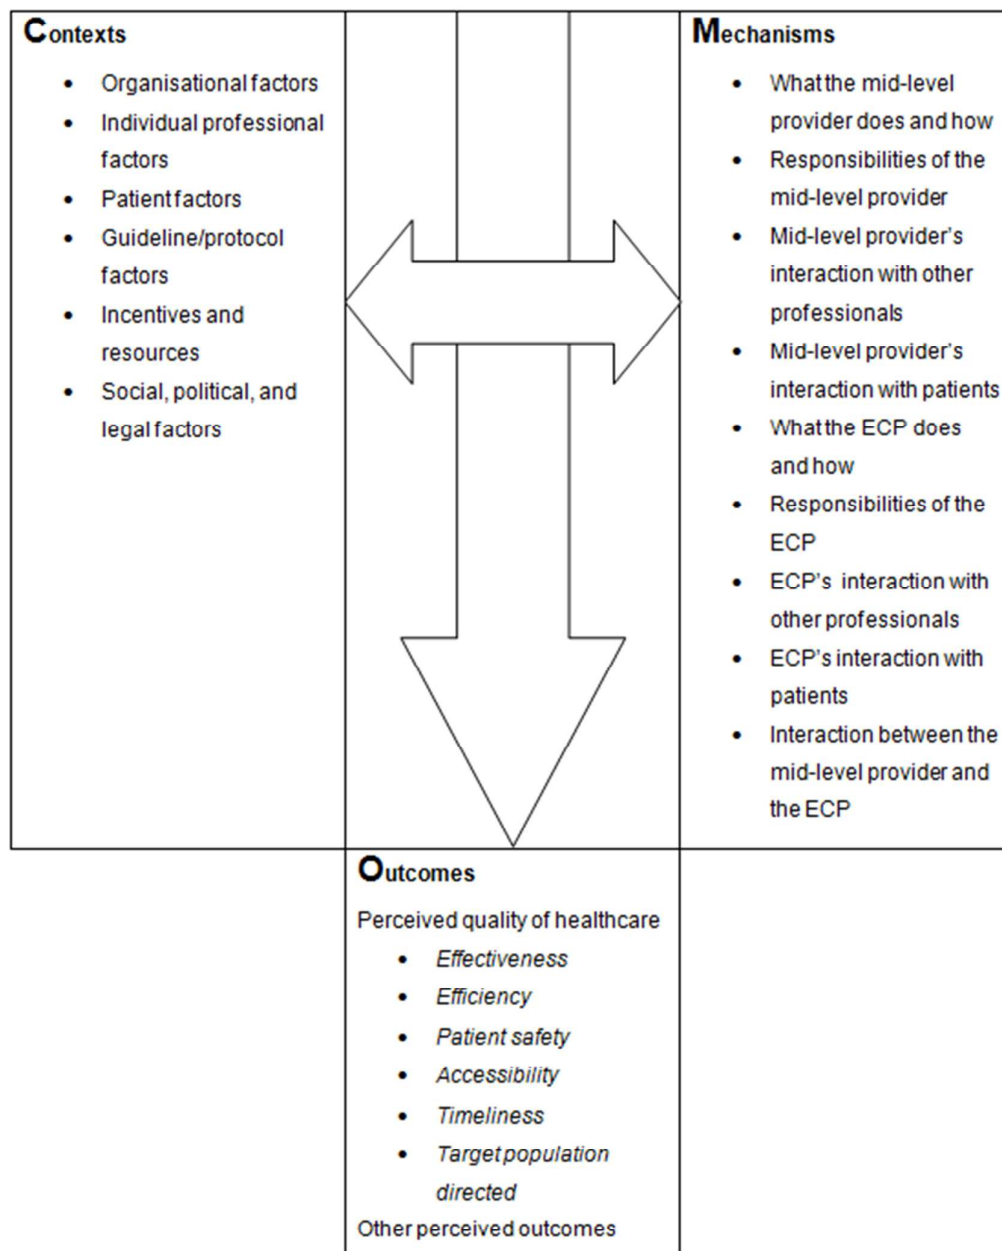

Figure 1 Interpretive framework of substitution of ECPs by mid-level providers

## Mechanisms

*Mechanism describes what it is about the intervention that brings about any effect.<sup>19</sup> Below are presented three head mechanisms. Figure 1 presents the underlying mechanisms.*

### Mechanism 1:

Based on their education and previous experience, mid-level providers are able to substitute for ECPs largely autonomously with at least maintenance of the quality of healthcare.

In the Netherlands, NPs were introduced in the late 1990s.<sup>20</sup> NPs are RNs with completed advanced education and clinical training on a master's level. They can provide a wide range of preventive, chronic healthcare and acute healthcare in a wide variety of clinical areas. While NPs combine nursing care with medical care, PAs mainly provide medical care.<sup>21</sup> PAs were introduced in the Netherlands in the early 2000s<sup>22</sup> The PA course is a graduate program that leads to a master's degree and the program consists of a didactic phase and a clinical phase.<sup>22</sup> PAs work across a wide range of healthcare settings and in a wide variety of clinical areas. Following the example of general practices, more and more practice nurses started working in nursing homes in the Netherlands the last decades.<sup>23</sup> Practice nurses in nursing homes are nurses with additional training on older patients and the nurse's role in nursing homes. NPs, PAs and practice nurses all have the potential to reduce ECPs' workload and to contribute to the quality of healthcare in the unique multi-disciplinary nursing home setting in the Netherlands.<sup>24 25</sup>

NPs and PAs are able to substitute for ECPs.<sup>26-29</sup> PAs mostly substitute for ECPs to a large extent with regard to medical tasks, while the extent to which NPs can substitute for ECPs varies from a smaller to a larger extent. In addition, the level of autonomy of the NP/PA in the medical domain varies from one nursing home to another.<sup>30</sup> PAs mostly have a high level of autonomy; they perform most of their tasks independent of an ECP. The level of autonomy of NPs varies. NPs/PAs can work at all different units of a nursing home: units for patients with physical disabilities, dementia special care units, or geriatric rehabilitation units, or a combination of different units. Tasks that can be replaced from ECPs to NPs or PAs are: admission of patients, assessment, and management and follow-up of patients with a variety of chronic conditions, as well as acute conditions, determining patients' care plan, visits, multidisciplinary meetings, family meetings, procedures such as prescription of medication, referral to other disciplines, out of hours care etc.<sup>25 26 28</sup> Furthermore, some NPs/PAs in nursing homes work as a specialist at the organisational level.<sup>21 25</sup> Some PAs work as a specialist in addition to their work as a generalist, while some NPs only work as a specialist. Examples of specialist areas are: wound care, pressure ulcers and diabetes mellitus.

Practice nurses can also substitute for ECPs.<sup>25</sup> The extent to which they can be a substitute on medical tasks and their level of autonomy in the medical domain is mostly lower than is the level of autonomy of NPs/PAs. Practice nurses mostly work at units for patients with physical disabilities or dementia special care units. They may work at one or more units in the organisation and they may



1  
2  
3 work as a specialist at the organisational level.<sup>25</sup> Tasks they can perform are: visits (in preparation for  
4 the ECP's visit), triage, wound rounds etc.<sup>25</sup>  
5  
6

7 Although the above indicates that physician substitution in nursing homes is possible, it also indicates  
8 that there is great diversity in how it is modelled and the elements of an optimal model are unknown.  
9

#### 10 11 Mechanism 2:

12 Physician substitution always is a collaboration between the mid-level provider and the ECP to  
13 guarantee quality of healthcare. The role of the ECP changes due to this collaboration.  
14

15  
16 The level of collaboration between mid-level providers and the ECP varies. In some cases, the NP/PA  
17 has structural meetings with the ECP, while in other cases, the NP/PA only consults with the ECP if  
18 needed <sup>25 28</sup>. Practice nurses perform most of their tasks under supervision of ECPs.<sup>25</sup> Trust and a  
19 'personal click' seem to be important factors for a successful collaboration.  
20  
21

22  
23 By shifting care to mid-level providers, the ECPs can spend more time on complex care or special  
24 areas of attention, such as palliative care. For less complex care, the role of the ECPs will become  
25 more of a coordinating role due to substitution of ECPs by mid-level providers. Furthermore, the ECPs  
26 are able to provide care to older adults living at home as a consultant for the general practitioner.  
27 Although physician substitution releases the burden on ECPs during the day, the burden during  
28 evening, night and weekend shifts may increase because, in most cases, mid-level providers do not  
29 participate in these shifts (resulting in the same number of shifts with fewer people).  
30  
31  
32

#### 33 34 Mechanism 3:

35  
36 Mid-level providers have a different way of working and they perform additional tasks compared to  
37 ECPs, which may lead to an increased quality of healthcare.  
38

39  
40 During the performance of their tasks, mid-level providers show, to a more or lesser extent, the  
41 following characteristics: closeness to the patient/family, strengthening of the care team, and acting as  
42 a bridge between the ECP and the care team and the patient or the family.<sup>21 25 28 30</sup> NPs and practice  
43 nurses show these characteristics more than do PAs.<sup>20</sup> In addition to the patient-related tasks, mid-  
44 level providers perform non-patient-related tasks as well, such as: teaching and coaching of the care  
45 team, innovation of healthcare, and innovation of the organisation of healthcare.<sup>25-30</sup>  
46  
47  
48

#### 49 50 **Contexts**

51 *The context are those features of the conditions that are relevant to the operation of the mechanism.*<sup>19</sup>  
52

53  
54 The factors that influence the level of physician substitution and the role of the mid-level provider in  
55 nursing homes can be classified according to the seven domains of the 'Tailored Implementation for  
56 Chronic Diseases' (TICD) checklist: 1) organisational factors, 2) individual professional factors, 3)  
57  
58  
59  
60

1  
2  
3 patient factors, 4) guideline factors, 5) incentives and resources, and 6) social, political, and legal  
4 factors.<sup>16 30 31</sup> The seventh domain, 'professional interactions', is seen as part of the mechanism.  
5  
6

### 7 Organisational factors

8 Organisational factors that influence the level of physician substitution are the demographics of an  
9 organisation (e.g. number of patients), the vision of the organisation on physician substitution and how  
10 the mid-level provider is positioned in the organisation. For example, in an organisation with a  
11 shortage of ECPs, the role of the mid-level provider (to substitute the ECP) will be mainly focused on  
12 care delivery, which might be different than in an organisation without a shortage of ECPs, where the  
13 role of the mid-level provider may be more focused on quality improvement. In addition, whether or not  
14 mid-level providers and ECPs form fixed couples or rotate influences the consistency of care and the  
15 level of trust in one another.<sup>16</sup> Furthermore, some nursing homes introduce the mid-level provider in  
16 their organisation without a clear vision on their role; this may hinder the implementation of physician  
17 substitution as the role of the mid-level provider is not clear to ECPs. When mid-level providers are  
18 positioned in the nursing team, their role will be different from cases in which mid-level providers are  
19 positioned in the medical team next to the ECP, which facilitates physician substitution. Another  
20 important factor is that the position of the mid-level provider needs time to embed in a nursing home  
21 organisation.  
22  
23  
24  
25  
26  
27  
28

### 29 Individual professional factors

30 Individual professional factors influence the role of the mid-level provider, especially the characteristics  
31 of the mid-level provider him/herself, of the ECP, and of the care team and other care providers.  
32 Characteristics of the mid-level provider him/herself are, for example, type of mid-level provider (NP,  
33 PA or practice nurse: see Mechanisms), background and level of experience. A pioneering spirit,  
34 ability to work independently, thirst for knowledge, and willingness to shape his or her own practice  
35 contribute to successful implementation of the mid-level provider position.<sup>16</sup> In addition, the willingness  
36 of the ECP to substitute tasks shapes the role of the mid-level provider.<sup>16</sup> An example of a  
37 characteristic of the care team, which influences the role of midlevel providers, the level of education.  
38 If this level is low, the mid-level provider will be inclined to work in the nursing domain instead of the  
39 medical domain. The level at which other care providers accept the mid-level provider also influences  
40 their role and the ease of performing their role.  
41  
42  
43  
44  
45  
46  
47

### 48 Patient factors

49 Characteristics of the patients that influence the role of midlevel provider are, for example, their type of  
50 care needs. In the Netherlands, there is a difference between units for patients with physical  
51 disabilities and dementia special care units, and geriatric rehabilitation units are often part of a nursing  
52 home.<sup>24</sup> Mid-level providers may work at all units; however, the type of unit determines their tasks.  
53 Another characteristics of patients can include their familiarity with the function of mid-level providers;  
54 if they are not familiar, they might demand to be taken care of by an ECP.<sup>16</sup>  
55  
56  
57  
58  
59  
60

### Guideline factors

Substitution of ECPs by mid-level providers is strongly influenced by the agreements, or lack thereof, made regarding substitution. Examples of agreements are vision on physician substitution, job description of the mid-level provider, collaborative agreements, and treatment protocols that are adjusted to the mid-level provider.

### Incentives and resources

Appropriate financing is an important factor for successful implementation of the mid-level provider in nursing homes.<sup>16</sup> This includes financing at the organisational level – how the employment of a mid-level provider is reimbursed – and at professional level, remuneration that is appropriate for the task and responsibilities of the mid-level provider.

### Social, political, and legal factors

The support of the mid-level provider as an ECP substitute from the professional association of ECPs is an important factor related to the acceptance of mid-level providers. Political and legal factors are also context features of physician substitution. These factors determine the boundaries of mid-level providers' authorization and they determine when, how, where, and by whom healthcare for older people is provided.<sup>16</sup> In the Netherlands, NPs and PAs are authorized to indicate and perform some of the so-called 'reserved procedures' described in the Individual Health Care Professions Act, which were initially only reserved for physicians. Furthermore, NPs and PAs are not authorized to sign death certificates.<sup>32 33</sup> Practice nurses are only allowed to perform reserved procedures after instructions from a physician, NP or PA. In addition, the ageing population and the societal reforms that shift care from the hospital/nursing home to the community influence the way mid-level providers are employed.

### **Outcomes**

*Outcome patterns are comprised of the intended and unintended consequences of the intervention*<sup>19</sup>.

The outcomes of physician substitution will be discussed as outcomes related to quality of healthcare based on the six concepts of quality of healthcare defined by the Ministry of Health, Welfare and Sport of the Netherlands (2014) and the World Health Organisation (2006): 1) effectiveness, 2) efficiency, 3) patient safety, 4) accessibility, 5) timeliness, and 6) target population directed.<sup>34 35</sup>

### Effectiveness

*Effectiveness refers to delivering healthcare that is adherent to an evidence base and results in improved health outcomes for individuals and communities, based on needs.*<sup>34 35</sup>

Substitution of ECPs by NPs or PAs seems to have a neutral or positive effect on hospital admissions, hospital days, emergency department visits, mortality, and number of medications used.<sup>16</sup> The effectiveness of substitution of ECPs by practice nurses is unknown.

### Efficiency

1  
2  
3 *Efficiency refers to healthcare that avoids waste.*<sup>34 35</sup>

4 Physician substitution appears to have a mixed effect on healthcare utilization (costs).<sup>16</sup> However, if  
5 mid-level providers perform the same activities as an ECP, they do this at lower costs because of their  
6 lower salary. In contrast to this, mid-level providers hardly ever fully replace ECPs.<sup>25</sup> The NP may  
7 supply a time savings for the ECP of between 40 and 88% and the practice nurse, between 35 and  
8 72%.<sup>25</sup> The time savings a PA supplies is unknown. It is unknown how the lower costs (salary) of mid-  
9 level providers relate to the substitution percentage in terms of efficiency. In addition, mid-level  
10 providers contribute to efficiency as they work in a structured manner and take into account the  
11 organisation of care while planning care activities, sometimes even more than ECPs do.  
12  
13  
14

#### 15 16 17 Patient safety

18 *Patient safety refers to avoiding harm during healthcare interventions.*<sup>34 35</sup>

19 Mid-level providers seem to be able to substitute for ECPs in terms of maintaining patient safety if they  
20 know and point out their boundaries and if an ECP is available for support if needed. In addition, mid-  
21 level providers might detect medical problems early because they are regularly present at the wards.  
22 They might also focus on the quality policy, such as developing protocols and stimulating working  
23 according to these protocols.<sup>25</sup>  
24  
25  
26  
27

#### 28 Accessibility

29 *Accessibility refers to how easily someone obtains access to healthcare, which does not vary in quality*  
30 *because of personal characteristics such as gender, race, ethnicity, geographical location, or*  
31 *socioeconomic status.*<sup>34 35</sup>

32 Mid-level providers may enhance the accessibility of medical care. They are easily accessible to the  
33 care team as well as for patients and family because they are often present at the unit, and have an  
34 open attitude.<sup>25</sup>  
35  
36  
37  
38

#### 39 Timeliness

40 *Timeliness refers to providing healthcare in time.*<sup>34 35</sup>

41 NPs appear to provide as many progress visits as ECPs, while NPs perform more acute visits.<sup>16</sup> In  
42 addition, mid-level providers may have/take more time for direct patient care than do ECPs.  
43  
44  
45

#### 46 Target population directed

47 *Target population directed refers to respecting the preferences, needs, and values of the target*  
48 *group.*<sup>34 35</sup>

49 Mid-level providers may contribute to target population directness because they know their patients  
50 very well, involve family in decisions, and communicate with patients and family on their own level.  
51  
52  
53

#### 54 Other outcomes ('unintended outcomes'<sup>19</sup>)

55 Other outcomes include, for example, continuity of care. Mid-level providers may contribute to the  
56 continuity of care as they work at one place for a long time.<sup>25</sup> In addition, the fact that mid-level  
57  
58  
59  
60

1  
2  
3 providers perform different tasks and have a different way of working than do ECPs may lead to better  
4 quality of healthcare, but also to other outcomes. For example, coaching of the care team during a  
5 training, including that which occurs on the job, may lead to increased knowledge of the care team. As  
6 the goal of this study is to describe physician substitution, we did not focus explicitly on these 'indirect'  
7 outcomes, but they will be included in the analysis.  
8  
9

## 10 11 **METHODS**

### 12 **Case selection**

13  
14 The goal of a case study is not statistical generalization, but analytic generalization. This means that  
15 the initially developed theory is used as a template with which the empirical results of the case study  
16 are compared. Each case must be adequately selected so that it either 1. predicts similar results  
17 (literal replication) or 2. predicts contrasting results for anticipated reasons (theoretical replication) <sup>17</sup>.  
18 In this study, each case will be comprised of one mid-level provider in a nursing home organisation.  
19 The first mechanism: mid-level providers can substitute for ECPs largely autonomously, at least in  
20 terms of maintenance of quality of healthcare. This is the mechanism we are most interested in and  
21 therefore, this mechanism will guide the case selection. The main goal of the selection is to select  
22 cases in which the mid-level provider works mainly in the medical domain. To gain insight into whether  
23 or not mid-level providers can substitute for ECPs largely autonomously, at least in terms of the  
24 maintenance of quality of healthcare, we will seek variation on the level of autonomy. We will also  
25 seek variation on other factors of the first mechanism. See Table 1 for a description of the selection  
26 criteria.  
27  
28  
29  
30  
31  
32  
33  
34  
35  
36  
37  
38  
39  
40  
41  
42  
43  
44  
45  
46  
47  
48  
49  
50  
51  
52  
53  
54  
55  
56  
57  
58  
59  
60

Table 1 Selection criteria

| Inclusion criteria                                                                                                                                                                                                                                                                                                                                                                                                                                                                                                                                                                                                                                                                                                                                                                                                                                                                            |
|-----------------------------------------------------------------------------------------------------------------------------------------------------------------------------------------------------------------------------------------------------------------------------------------------------------------------------------------------------------------------------------------------------------------------------------------------------------------------------------------------------------------------------------------------------------------------------------------------------------------------------------------------------------------------------------------------------------------------------------------------------------------------------------------------------------------------------------------------------------------------------------------------|
| <ul style="list-style-type: none"> <li>• <b>More than 65% of the patient related tasks(1) the mid-level provider performs should be in the medical domain(2), according to the mid-level provider's own estimation</b></li> <li>• The mid-level provider should be employed for minimal 0,6 Full Time Equivalents</li> <li>• 80% or more of the patients the mid-level provider takes care for should be 65 years or older</li> <li>• If possible (depending on the available cases) the mid-level provider should be working for more than 2 years as a mid-level provider in a nursing home</li> </ul>                                                                                                                                                                                                                                                                                      |
| Maximum variation criteria                                                                                                                                                                                                                                                                                                                                                                                                                                                                                                                                                                                                                                                                                                                                                                                                                                                                    |
| <ul style="list-style-type: none"> <li>• <b>Level of autonomy(3) (&gt;70%/&lt;70%), in the performance of patient related tasks in the medical domain, according to the mid-level provider's own estimation</b></li> <li>• Working as a generalist, or a specialist, or both</li> <li>• Working at ward level, or at organisation level, or both</li> <li>• Working at ward for patients with physical disabilities, dementia special care unit, or geriatric rehabilitation unit, or a combination of different units</li> <li>• Type of mid-level provider (NP/PA/practice nurse)</li> <li>• Male, female</li> </ul>                                                                                                                                                                                                                                                                        |
| <p>(1) Patient related tasks: Direct patient related tasks and indirect patient related tasks:<br/> Direct patient related tasks: tasks that are performed in presence of/with the patient and/or family.<br/> Indirect patient related tasks: tasks that are performed for the patient, but not per se in presence of the patient.</p> <p>(2) Medical domain: Medical examination of the patient (history, physical examination etc.), medical diagnostics, formulate a medical treatment plan, indicate and/or perform medical procedures (prescription of medication, perform surgical procedures, give injections etc.).</p> <p>(3) Autonomy: Independent indication and performance of patient related tasks in the medical domain. The performance can also be delegated to another care provider. Consultation with an ECP is possible, but the mid-level provider is responsible.</p> |

The professional associations of NPs, PAs, and practice nurses in nursing homes will be asked to distribute a questionnaire among their members. This questionnaire contains questions about the inclusion criteria and the maximum variation criteria. The completed questionnaires will be used to select seven cases. The number of seven was chosen to create a balance between depth and variation in the study with the given budget and time available.

### Setting

The setting will be seven nursing home organisations in the Netherlands that have one or more locations, and the (different) unit(s) where the mid-level providers work.

### Participants

The participants will be:

- The mid-level provider
- The manager that has been/is involved the most in the decision to substitute for ECPs
- The supervisor/manager of the mid-level provider
- The head ECP
- All ECPs with whom the mid-level provider collaborates directly

- Five to eight nurses/healthcare assistants/nursing team leaders with whom the mid-level provider collaborates
- Five patients and/or their informal caregiver for which the mid-level provider gives care.

#### Data collection

Before the start of the study, the Board of Directors of the nursing home organisations will be informed verbally and by letter. The Board of Directors will also be asked to provide informed consent for the entire study. In each case, two researchers (MLO and IM) will collect all data in two weeks. Data collection will consist of observations, interviews and questionnaires (see Table 2). All interviews will be audio-taped and transcribed verbatim. Data will be collected between September 2015 and January 2017.

Table 2 Data collection

| Participant                                                                                          | Data collection method                                                                                                                                                                                                                                                                                                                                                                                                                                                                                                                                           |
|------------------------------------------------------------------------------------------------------|------------------------------------------------------------------------------------------------------------------------------------------------------------------------------------------------------------------------------------------------------------------------------------------------------------------------------------------------------------------------------------------------------------------------------------------------------------------------------------------------------------------------------------------------------------------|
| Mid-level provider                                                                                   | <ul style="list-style-type: none"> <li>• Observation (4x4 hours)</li> <li>• Questionnaire</li> <li>• Interview (after observation)</li> </ul>                                                                                                                                                                                                                                                                                                                                                                                                                    |
| Manager involved in physician substitution                                                           | <ul style="list-style-type: none"> <li>• Questionnaire</li> <li>• Interview</li> </ul>                                                                                                                                                                                                                                                                                                                                                                                                                                                                           |
| Supervisor/manager of the mid-level provider                                                         | <ul style="list-style-type: none"> <li>• Interview</li> </ul>                                                                                                                                                                                                                                                                                                                                                                                                                                                                                                    |
| ECP with whom the mid-level provider collaborates most intensely                                     | <ul style="list-style-type: none"> <li>• Observation (2x2 hours)</li> <li>• Questionnaire</li> <li>• Interview (after observation)</li> </ul>                                                                                                                                                                                                                                                                                                                                                                                                                    |
| ECPs with whom the mid-level provider collaborates directly                                          | <ul style="list-style-type: none"> <li>• Questionnaire</li> <li>• Interview</li> </ul>                                                                                                                                                                                                                                                                                                                                                                                                                                                                           |
| Head of the ECPs                                                                                     | <ul style="list-style-type: none"> <li>• Interview</li> </ul>                                                                                                                                                                                                                                                                                                                                                                                                                                                                                                    |
| Five nurses/healthcare assistants/nursing team leaders with whom the mid-level provider collaborates | <ul style="list-style-type: none"> <li>• Interview</li> </ul>                                                                                                                                                                                                                                                                                                                                                                                                                                                                                                    |
| Five patients and/or their informal caregiver the mid-level provider takes care of                   | <ul style="list-style-type: none"> <li>• Interview</li> </ul>                                                                                                                                                                                                                                                                                                                                                                                                                                                                                                    |
| Patient council/family council                                                                       | <ul style="list-style-type: none"> <li>• Focus group interview</li> </ul>                                                                                                                                                                                                                                                                                                                                                                                                                                                                                        |
| Different participants                                                                               | Documents <ul style="list-style-type: none"> <li>• Mission and vision of the organisation;</li> <li>• Mission and vision of the organisation on physician substitution;</li> <li>• Job description of all mid-level providers in the organisation and of the ECP;</li> <li>• Working arrangements for the mid-level provider and the ECP;</li> <li>• Treatment protocols for the mid-level provider;</li> <li>• Annual report of the organisation of the preceding year;</li> <li>• Information about the mid-level provider for patients and family.</li> </ul> |

#### Informed consent

All participants will be informed verbally and by letter and will be asked to provide informed consent. With the help of a contact person (e.g. manager, nursing team leader) in the organisation, a random sample of five to eight nurses/healthcare assistants/nursing team leaders will be drawn. With the help of the contact person and/or the mid-level provider, patients will be selected for an interview. Five patients who are 65 years or older and mentally competent (according to the judgement of the contact person or the mid-level provider) will be asked for an interview, together with his/her informal caregiver. On the dementia special care unit, only the informal care giver will be interviewed. In addition, the patient council will be contacted via the mid-level provider and the members will be invited for a focus group interview, as well as to sign an informed consent.

Before the start of the study, all patients, informal caregivers and care providers of the units where observations will take place will be informed about the study. The method for informing participants will be determined in collaboration with the Board of Directors and the contact person. During the observations, all patients that the mid-level provider and the ECP visit will receive brief information



1  
2  
3 about the study and then will be verbally asked for informed consent to observe the contact with the  
4 mid-level provider or ECP (i.e. a written informed consent form will not be used). This will be the same  
5 for all care providers that the mid-level provider/ECP has contact with during the observations.  
6  
7

### 8 Observations

9  
10 Observational guides are developed based on the framework depicted in Figure 1. The role of the  
11 researcher during observations will be as a non-participant.<sup>36</sup> The observational instrument consists of  
12 two parts. In one part, the researcher will write down what tasks the mid-level provider performs and  
13 how he/she performs these tasks. In the second part, the researcher will write down a general  
14 impression on topics such as level of autonomy and care for the client/family after each observation  
15 moment. The field notes in the first part of the observation instrument can be used to fill out the  
16 second part. After each observation moment, the researcher will directly type out the field notes on a  
17 computer.  
18  
19  
20

### 21 Interviews and questionnaires

22  
23 The interview guides will be developed based on the framework depicted in Figure 1, with a different  
24 focus for each group of participants. The interview with the mid-level provider will be very extensive  
25 and will focus on all relevant items; the interview with the manager will mainly focus on the vision of  
26 the organisation on physician substitution and the interview with patients and/or their informal  
27 caregiver will mainly focus on their needs and their experiences with the mid-level provider. Tasks and  
28 responsibilities will be collected via a questionnaire for the mid-level provider and the ECPs with whom  
29 the mid-level provider collaborates directly. The specific outcomes (see Figure 1) will be inquired about  
30 in the interviews with the mid-level provider, the ECPs with whom the mid-level providers collaborate  
31 directly, and the nurses/healthcare assistants/nursing team leaders with whom the mid-level provider  
32 collaborates. Participants will be asked to compare the mid-level provider and the ECP on all of these  
33 outcomes. In the other interviews, outcomes will be discussed in general. In addition, all participants,  
34 except for the patients and/or their informal caregiver and the patient council/family council, will be  
35 asked whether they perceive the way physician substitution is modelled as being optimal and whether  
36 they would recommend it to other organisations. After analysis of each case, a member check  
37 (confirmatory focus group interview) will be carried out. See Data Analysis for further details.  
38  
39  
40  
41  
42  
43  
44  
45

### 46 **DATA ANALYSIS**

47 Data will be analysed in the five weeks directly after data collection of each case. At completion of the  
48 initial analysis of all cases at the end of the study, a cross-case analysis will be carried out.  
49  
50

51 The data analysis will rely on theoretical propositions and explanation building. This means that the  
52 theoretical propositions (the initial theory) that led to this case study will be followed and that the  
53 analysis aims to answer the question: what mechanism contributes in what context and in what  
54 respect to the outcome?<sup>17 19</sup>  
55  
56  
57  
58  
59  
60

## Single case analysis

### Qualitative analysis

The tasks in the first part of the observation instrument will be coded according to the possible tasks described in advance. However, there is also space for tasks that are not described in advance. Each observation moment will be coded by one researcher and checked by the other.

The two researchers who collect the data (MLO and IM) will compare their notes in the second part of the observation instrument – the general impression. Differences will be discussed, and finally, they will make an assembly of the different forms. If no consensus can be reached, they will ask clarification during the member check (see below).

Four researchers (MLO, IM, AvV and LvD) will qualitatively analyse the interviews and documents. MLO will code all interviews. In the first case, a second researcher will independently code all interviews. If sufficient consensus is reached in the coding, for the next cases, half of the interviews will be coded independently by a second researcher; for the other half, MLO's codes will be checked by another researcher. The computer program ATLAS.ti will be used for analysis. Content analysis will be used to analyse the data.<sup>37</sup> This is a method to attain both condensed and broad descriptions of a phenomenon by analysing text data.<sup>37</sup> The developed theory of context, mechanism, and outcome will be tested using deductive coding. This means that a structured categorization matrix based on Figure 1 will be used. However, aspects that do not fit the categorization matrix will be used to create new categories based on the principle of inductive content analysis.<sup>37</sup>

The researchers who collect the data will use the method of 'outlining the main message'.<sup>38</sup> The researchers will pretend that the deadline to hand in the final case description is imminent and they will ask themselves the question: how would the main message of this case be formulated.<sup>38</sup> This question focuses the researcher to think about the content of the result section. Both researchers will do this independently during analysis and they will compare and discuss their main message. In addition, they will check their main message with the data collected.

### Quantitative analysis

The questionnaires and the quantitative parts of the interviews (demographic data) will be quantitatively analysed. The computer program SPSS Statistics 20 will be used for analysis. Data will be analysed using descriptive statistics.

### Member check

For each individual case, MLO will write a case description and the other researchers will check it. This description will build on the theoretical propositions made at the start of this case study. This description will be used for a member check within the case.<sup>38 39</sup> The mid-level provider, the ECP that has been observed, the manager involved in physician substitution, the manager/supervisor of the mid-level provider and two members of the care team will be asked to read the case description. In a

1  
2  
3 focus group, these participants will be asked whether the case description is an accurate description of  
4 their case and clarification on the parts that turned out to be unclear will be asked. The member check  
5 has some drawbacks, such as participants struggling with abstract synthesis, participants that want to  
6 change their initial response and participants with different views on the same data.<sup>40</sup> To face these  
7 drawbacks, a focus group will be organised so that the interaction process can provide additional  
8 information, helping to make it clear why someone struggles with abstract synthesis, why someone  
9 has changed his or her mind or why participants have different views. All of this information will enrich  
10 the case description. The information gathered during the focus group will be used to further develop  
11 the case description.  
12  
13  
14

### 15 16 17 **Cross-case analysis**

18 When the initial analysis of each case is completed, the process of realistic cumulation will begin.<sup>18</sup>  
19 This means a motion up and down the ladder of abstraction and specification; the data gathered will  
20 be used to further develop the 'abstract' theory of physician substitution in nursing homes. The cross-  
21 case analysis will go beyond the separate Cs, Ms and Os. For each case, the CMO-configurations will  
22 be determined based on the initial analysis. By answering questions like which elements of the  
23 mechanism and the context give what outcomes, these CMO-configurations will be developed at  
24 individual level, group level (e.g. mid-level providers, ECPs, care team, clients, manager etc.) and  
25 case level. Where outcomes are unknown, anticipated outcomes (in line with the collected data) will be  
26 formulated. In addition, CMO-configurations across cases will be determined.<sup>41 42</sup> At the end, these  
27 CMO configurations will help us answer the research questions.  
28  
29  
30  
31  
32

### 33 **VALIDITY AND RIGOUR**

34 The trustworthiness of the study findings is based on the following four criteria: (a) credibility, (b)  
35 dependability, (c) confirmation, and (d) transferability.<sup>39</sup>

- 36 • Credibility will be ensured by the selection of seven different cases according to inclusion  
37 criteria and maximum variation sampling. In addition all relevant stakeholders involved in  
38 physician substitution will be included and a member check will be performed in each case.  
39 The collection of different types of data, known as data triangulation, also contributes to the  
40 credibility. To diminish the observer effect<sup>36</sup>, the researchers will explain to the care provider  
41 being observed that there is no good or bad behaviour and that the goal of the observation is  
42 only to describe the case and not to judge the behaviour.  
43
- 44 • Dependability will be promoted by thoroughly analysing and involving all researchers in the  
45 cross-case analysis.  
46
- 47 • Confirmation will be enhanced by keeping a logbook on methodological issues, in addition to  
48 memos reflecting on their role during the observations and interviews. Both researchers are  
49 health scientists with a nursing background. They are aware of the fact that their background  
50 may cause them to focus more on the nursing domain than on the medical domain during data  
51 collection and analysis.  
52  
53  
54  
55  
56  
57  
58  
59  
60

1  
2  
3 During non-participant observations, it is a challenge to remain objective and not selective<sup>36</sup>.  
4 Dealing with this challenge starts with acknowledging that an observer can never be truly  
5 objective and will always be somewhat selective.<sup>43</sup> Objectivity will be enhanced through the  
6 collection of field notes from two researchers, observations during different moments,  
7 structured data collection, check of the observers' ideas on the main message relative to the  
8 collected data, discussions of the findings in the research team, and the member check.

9  
10 Prior to the start of the case study and the research proposal, the observation instruments  
11 were tested by the two researchers (MLo and IM) using an ECP and a NP, both for four hours.  
12 After the observations, they discussed and compared their field notes and discussed their role  
13 during observations. After this test, they made changes to the observation instruments, in  
14 addition to making decisions on the focus during observations (the mechanism) and on their  
15 role during observation (e.g. introduce oneself with a handshake). By performing the test, the  
16 researchers developed the observation instrument, as well as establishing themselves as a  
17 data collection instrument.

- 18 • Transferability: clear description of the organisations and the participants' characteristics will  
19 be presented in the paper to be published to facilitate readers' judgment about transferability.  
20  
21

## 22 **DISCUSSION**

23  
24 This case study will provide insight into how substitution of ECPs by mid-level providers is modelled in  
25 different nursing homes and what mechanism contributes in what context and in what respect to  
26 quality of healthcare for older people. In addition, it will give input for the most optimal model of  
27 physician substitution in nursing homes. As stated in the preliminary theory, the model might strongly  
28 depends on the context, so there might be no single best model. Furthermore, each model studied in  
29 this case study might have strong and weak parts. Therefore, the most optimal model (for a given  
30 context) might consist of a combination of parts of different models.  
31  
32

33  
34 This case study will build on a theory based on the literature and a focus group study conducted by  
35 the research team. The challenge of performing a case study with certain propositions is to keep an  
36 open mind while collecting data.<sup>17</sup> Although the theory will guide data collection and analysis, it must  
37 not confine the data collection and analysis process; there has to be room for alternative hypotheses.  
38 The research team will face this challenge by being aware of a vision that is too narrow during data  
39 collection and discussing the theory and alternative hypotheses in regular meetings. In this case study,  
40 all outcomes are perceived outcomes and no quantitative outcomes are measured. This should be  
41 taken into account while interpreting the results. It might be that we cannot 'complete' some CMO-  
42 configurations because the outcome of a certain mechanism in a certain context is not fully clear.  
43 However, this case study will provide insight into the possible outcomes related to physician  
44 substitution in nursing homes, which might inform further research.  
45  
46  
47  
48  
49  
50  
51  
52  
53  
54  
55  
56  
57  
58  
59  
60

1  
2  
3 The results of this case study will inform care providers, managers and policy administrators in their  
4 decisions regarding how to substitute mid-level providers for ECPs in nursing homes in a way that  
5 contributes most to perceived quality of healthcare for older people.  
6  
7

### 8 **Ethics and dissemination**

9  
10 The research ethics committee of the region Arnhem Nijmegen in the Netherlands concluded that this  
11 study does not fall within the scope of the Dutch Medical Research Involving Human Subjects Act  
12 (WMO) (registration number 2015/1914). Before the start of the study, the Board of Directors of the  
13 nursing home organisations will be informed verbally and by letter. The Board of Directors will also be  
14 asked to provide informed consent for the entire study. In addition, all participants will be informed  
15 verbally and by letter and will be asked to provide informed consent. Findings will be disseminated by  
16 publication in a peer-reviewed journal, international and national conferences, national professional  
17 associations and policy partners in national government.  
18  
19  
20  
21

### 22 **Authors' contributions**

23 AP, RK and MLa conceived the idea for the study and obtained funding. MLo, AP, AvV and MLa  
24 wrote the initial theory. MLo, AP, AvV, LS, RK and MLa designed the study. MLo drafted the  
25 manuscript for submission to *BMJ Open*. AP, AvV, LS, RK and MLa revised the manuscript. All  
26 authors read and approved the final manuscript.  
27  
28  
29

### 30 **Funding**

31  
32 This study is part of a larger project on physician substitution in healthcare for older people. Funding of  
33 this project (number: 321580) was confirmed in August 2013 by the Ministry of Health, Welfare and  
34 Sport of the Netherlands. The funding body was not involved in the design of the study.  
35  
36

### 37 **Competing interests**

38  
39 The authors declare that they have no competing interests.  
40  
41  
42  
43  
44  
45  
46  
47  
48  
49  
50  
51  
52  
53  
54  
55  
56  
57  
58  
59  
60

## References

1. Donald F, Martin-Misener R, Carter N, Donald EE, Kaasalainen S, Wickson-Griffiths A, Lloyd M, Akhtar-Danesh N, DiCenso A. A systematic review of the effectiveness of advanced practice nurses in long-term care. *J Adv Nurs*. 2013;69(10):2148–2161.
2. Caprio TV. Physician practice in the nursing home: collaboration with nurse practitioners and physician assistants. *Ann Longterm Care*. 2006;14(3):17–24.
3. Intrator O, Miller EA, Gadbois E, Acquah JK, Makineni R, Tyler D. Trends in nurse practitioner and physician assistant practice in nursing homes, 2000–2010. *Health Serv Res*. 2015; doi: 10.1111/1475-6773.12410.
4. Descriptors defining levels in the European Qualifications Framework (EQF). <https://ec.europa.eu/ploteus/en/content/descriptors-page>. Accessed 1 February 2016.
5. World Health Organisation: World report on ageing and health. 2015. [http://apps.who.int/iris/bitstream/10665/186463/1/9789240694811\\_eng.pdf?ua=1](http://apps.who.int/iris/bitstream/10665/186463/1/9789240694811_eng.pdf?ua=1). Accessed 16 November 2015.
6. van der Aa MJ, Evers SM, Klosse S, Maarse JA. [Reform of long-term care in the Netherlands: solidarity maintained?]. *Ned Tijdschr Geneeskd*. 2014;158:A8253.
7. Dimant J. Roles and responsibilities of attending physicians in skilled nursing facilities. *J Am Med Dir Assoc* 2003;4(4):231–243.
8. Koopmans RT, Lavrijsen JC, Zuidema SU. The physician's role in nursing homes: the Dutch solution. *Arch Intern Med*. 2010;170(15):1406–1407.
9. Koopmans RT, Lavrijsen JC, Hoek JF, Went PB, Schols JM. Dutch elderly care physician: a new generation of nursing home physician specialists. *J Am Geriatr Soc*. 2010;58(9):1807–1809.
10. Ouslander JG, Lamb G, Perloe M, Givens JH, Kluge L, Rutland T, Atherly A, Saliba D. Potentially avoidable hospitalizations of nursing home residents: frequency, causes, and costs. *J Am Geriatr Soc*. 2010;58(4):627–635.
11. Katz PR, Karuza J, Lima J, Intrator O. Nursing home medical staff organisation: correlates with quality indicators. *J Am Med Dir Assoc*. 2011;12(9):655–659.
12. Capaciteitsorgaan. The 2013 recommendations for medical specialist training. Utrecht; 2013.
13. Frank C, Seguin R, Haber S, Godwin M, Stewart GI. Medical directors of long-term care facilities: Preventing another physician shortage? *Can Fam Physician*. 2006;52(6):752–753.
14. Hauer KE, Durning SJ, Kernan WN, Fagan MJ, Mintz M, O'Sullivan PS, Battistone M, DeFer T, Elnicki M, Harrell H, Reddy S, Boscardin CK, Swartz MD. Factors associated with medical students' career choices regarding internal medicine. *JAMA*. 2008;300(10):1154–1164.
15. Petterson SM, Liaw WR, Phillips RL, Jr., Rabin DL, Meyers DS, Bazemore AW. Projecting US primary care physician workforce needs: 2010–2025. *Ann Fam Med* 2012;10(6):503–509.
16. Lovink MH, Persoon A, Koopmans RT, van Vught AJ, Schoonhoven L, Laurant MG. Effect of substituting nurse practitioners, physician assistants or nurses for physicians concerning healthcare for the aging population: a systematic literature review. *J Adv Nurs*, 2016. Submitted
17. Yin RK. Case study research. Design and methods. Los Angeles: SAGE; 2014.
18. Pawson R, Tilley N. Realistic evaluation. London: SAGE; 1997.
19. Pawson R, Tilley N. Realist evaluation. 2004. [http://www.communitymatters.com.au/RE\\_chapter.pdf](http://www.communitymatters.com.au/RE_chapter.pdf). Accessed 6 January 2015.
20. ter Maten-Speksnijder A, Grypdonck M, Pool A, Meurs P, van Staa AL. A literature review of the Dutch debate on the nurse practitioner role: efficiency vs. professional development. *Int Nurs Rev*. 2014;61(1):44–54.
21. Laurant M, van der Camp K, Boerboom L, Wijers N. Een studie naar functieprofielen, taken en verantwoordelijkheden van Physician Assistants en Verpleegkundig Specialisten. Nijmegen: Scientific Institute for Quality of Healthcare Radboudumc; 2014.
22. van Vught AJAH, van den Brink GTWJ, Harbert K, Ballweg R. Physician assistant profession. In: *The Wiley Blackwell Encyclopedia of Health, Illness, Behavior, and Society*. 2014: 1830–1832. <http://www.platformzorgmasters.nl/publicatie/2013-2/>. Accessed 18 November 2015
23. Freund T, Everett C, Griffiths P, Hudon C, Naccarella L, Laurant M. Skill mix, roles and remuneration in the primary care workforce: who are the healthcare professionals in the primary care teams across the world? *Int J Nurs Stud*. 2015;52(3):727–743.

- 1
  - 2
  - 3
  - 4
  - 5
  - 6
  - 7
  - 8
  - 9
  - 10
  - 11
  - 12
  - 13
  - 14
  - 15
  - 16
  - 17
  - 18
  - 19
  - 20
  - 21
  - 22
  - 23
  - 24
  - 25
  - 26
  - 27
  - 28
  - 29
  - 30
  - 31
  - 32
  - 33
  - 34
  - 35
  - 36
  - 37
  - 38
  - 39
  - 40
  - 41
  - 42
  - 43
  - 44
  - 45
  - 46
  - 47
  - 48
  - 49
  - 50
  - 51
  - 52
  - 53
  - 54
  - 55
  - 56
  - 57
  - 58
  - 59
  - 60
24. Schols JM, Crebolder HF, van Weel C. Nursing home and nursing home physician: the Dutch experience. *J Am Med Dir Assoc.* 2004;5(3):207–212.
25. Bloemendaal I, Albers D, de Kroon S, Dekker A: Taakverschuiving bij de medische zorg vanuit het verpleeghuis. Utrecht: Prismant; 2009.
26. Bakerjian D. Care of nursing home residents by advanced practice nurses. A review of the literature. *Res Gerontol Nurs* 2008;1(3):177–185.
27. Abdallah LM. EverCare nurse practitioner practice activities: similarities and differences across five sites. *J Am Acad Nurse Pract.* 2005;17(9):355–362.
28. Martin-Misener R, Donald F, Wickson-Griffiths A, Akhtar-Danesh N, Ploeg J, Brazil K, Kaasalainen S, McAiney C, Carter N, Schindel Martin L, Sangster-Gormley E, Taniguchi A. A mixed methods study of the work patterns of full-time nurse practitioners in nursing homes. *J Clin Nurs.* 2014;24(9–10):1327–1337.
29. Abdallah L, Fawcett J, Kane R, Dick K, Chen J. Development and psychometric testing of the EverCare Nurse Practitioner Role and Activity Scale (ENPRAS). *J Am Acad Nurse Pract.* 2005;17(1):21–26.
30. Wallenburg I, Janssen M, de Bont A. De rol van de Verpleegkundig Specialist en de Physician Assistant in de zorg. Een praktijkonderzoek naar taakherschikking in de tweede- en derdelijnszorg in Nederland. Rotterdam: Rotterdam Instituut Beleid & Management Gezondheidszorg Erasmus Universiteit Rotterdam; 2015.
31. Flottorp SA, Oxman AD, Krause J, Musila NR, Wensing M, Godycki-Cwirko M, Baker R, Eccles MP. A checklist for identifying determinants of practice: a systematic review and synthesis of frameworks and taxonomies of factors that prevent or enable improvements in healthcare professional practice. *Implement Sci.* 2013;8:35.
32. The Nurse Practitioner in the Netherlands. <http://venvnvs.nl/wp-content/uploads/sites/164/2015/08/2015-10-30-Factsheet-Nurse-Practitioner-Netherlands-2015.pdf>. Accessed 7 April 2016.
33. Timmermans MJ, van Vught AJ, Wensing M, Laurant MG. The effectiveness of substitution of hospital ward care from medical doctors to physician assistants: a study protocol. *BMC Health Serv Res.* 2014;14:43.
34. Wat is kwaliteit? <http://www.nationaalkompas.nl/preventie/thema-s/kwaliteit-van-preventie/wat-is-kwaliteit>. Accessed 7 May 2015.
35. World Health Organisation: Quality of care a process for making strategic choices in health systems. 2006. [http://www.who.int/management/quality/assurance/QualityCare\\_B.Def.pdf](http://www.who.int/management/quality/assurance/QualityCare_B.Def.pdf). Accessed 7 May 2015.
36. Liu F, Maitlis S. Nonparticipant observation. In: *Encyclopedia of Case Study Research*. Edited by Mills AJ, Durepos G, Wiebe E. Thousand Oaks: Sage; 2010.
37. Elo S, Kyngas H. The qualitative content analysis process. *J Adv Nurs*, 2008;62(1):107–115.
38. Boeije H: *Analysis in qualitative research*. London: Sage; 2010.
39. Lincoln YS, Guba EG. *Naturalistic inquiry*. Beverly Hills: Sage; 1985.
40. Sandelowski M. Rigor or rigor mortis: the problem of rigor in qualitative research revisited. *ANS Adv Nurs Sci.* 1993;16(2):1–8.
41. Punton M, Vogel I, Lloyd R. Reflections from a realist evaluation in progress: scaling ladders and stitching theory. *CDI Practice Paper.* 2016;(Number 18).
42. Abhyankar P, Cheyne H, Maxwell M, Harris F, McCourt C. A realist evaluation of a normal birth programme. *Evidence Based Midwifery* 2013,11(4):112–119.
43. Mason J. *Qualitative researching*. London: Sage; 2002.

# BMJ Open

## Substituting physicians with nurse practitioners, physician assistants or nurses in nursing homes – protocol for a realist evaluation case study

|                                 |                                                                                                                                                                                                                                                                                                                                                                                                                                                                                                                                                                                                                                                                                                                                                                                                                                                    |
|---------------------------------|----------------------------------------------------------------------------------------------------------------------------------------------------------------------------------------------------------------------------------------------------------------------------------------------------------------------------------------------------------------------------------------------------------------------------------------------------------------------------------------------------------------------------------------------------------------------------------------------------------------------------------------------------------------------------------------------------------------------------------------------------------------------------------------------------------------------------------------------------|
| Journal:                        | <i>BMJ Open</i>                                                                                                                                                                                                                                                                                                                                                                                                                                                                                                                                                                                                                                                                                                                                                                                                                                    |
| Manuscript ID                   | bmjopen-2016-015134.R1                                                                                                                                                                                                                                                                                                                                                                                                                                                                                                                                                                                                                                                                                                                                                                                                                             |
| Article Type:                   | Protocol                                                                                                                                                                                                                                                                                                                                                                                                                                                                                                                                                                                                                                                                                                                                                                                                                                           |
| Date Submitted by the Author:   | 13-Feb-2017                                                                                                                                                                                                                                                                                                                                                                                                                                                                                                                                                                                                                                                                                                                                                                                                                                        |
| Complete List of Authors:       | Lovink, Marleen; Radboud university medical center, Scientific Center for Quality of Healthcare (IQ healthcare)<br>Persoon, Anke; Radboud university medical center, Department of Primary and Community Care<br>van Vught, Anneke; HAN University of Applied Sciences, Faculty of Health and Social Studies<br>Schoonhoven, Lisette; University of Southampton, Faculty of Health Sciences; Radboud university medical center, Scientific Center for Quality of Healthcare (IQ healthcare)<br>Koopmans, Raymond; Radboud university medical center, Department of Primary and Community Care; Joachim & Anna, Center for Specialized Geriatric Care<br>Laurant, Miranda; Radboud university medical center, Scientific Center for Quality of Healthcare (IQ healthcare); HAN University of Applied Sciences, Faculty of Health and Social Studies |
| <b>Primary Subject Heading</b>: | Geriatric medicine                                                                                                                                                                                                                                                                                                                                                                                                                                                                                                                                                                                                                                                                                                                                                                                                                                 |
| Secondary Subject Heading:      | Qualitative research, Nursing                                                                                                                                                                                                                                                                                                                                                                                                                                                                                                                                                                                                                                                                                                                                                                                                                      |
| Keywords:                       | GERIATRIC MEDICINE, nurse practitioner, physician assistant, nursing home, substitution                                                                                                                                                                                                                                                                                                                                                                                                                                                                                                                                                                                                                                                                                                                                                            |
|                                 |                                                                                                                                                                                                                                                                                                                                                                                                                                                                                                                                                                                                                                                                                                                                                                                                                                                    |

SCHOLARONE™  
Manuscripts



1  
2  
3 **Substituting physicians with nurse practitioners, physician assistants or nurses in nursing**  
4 **homes – protocol for a realist evaluation case study**  
5  
6

7 **Authors**

8 Marleen H. Lovink, Anke Persoon, Anneke J.A.H. van Vught, Lisette Schoonhoven, Raymond T.C.M.  
9 Koopmans, Miranda G.H. Laurant  
10

11  
12 **Corresponding author**

13 Marleen H. Lovink, RN MSc, PhD student  
14 Radboud university medical center, Radboud Institute for Health Sciences, Scientific Center for Quality  
15 of Healthcare (IQ healthcare), P.O. box 9101, 114, 6500 HB, Nijmegen, the Netherlands  
16  
17 Email: [marleen.lovink@radboudumc.nl](mailto:marleen.lovink@radboudumc.nl)  
18  
19 Telephone: +31243666873  
20  
21

22 **Co-authors**

23 Anke Persoon, RN PhD, senior researcher  
24 Radboud university medical center, Radboud Institute for Health Sciences, Department of Primary and  
25 Community Care, the Netherlands  
26  
27 [anke.persoon@radboudumc.nl](mailto:anke.persoon@radboudumc.nl)  
28  
29

30 Anneke (J.A.H.) van Vught, PhD, associate professor  
31 HAN University of Applied Sciences, Faculty of Health and Social Studies, Nijmegen, the Netherlands  
32  
33 [a.vanvught@han.nl](mailto:a.vanvught@han.nl)  
34  
35

36 Lisette Schoonhoven, PhD, professor of nursing and visiting professor  
37 University of Southampton, Faculty of Health Sciences, Southampton, UK  
38  
39 and Radboud university medical center, Radboud Institute for Health Sciences, Scientific Center for  
40 Quality of Healthcare (IQ healthcare), Nijmegen, the Netherlands  
41  
42 [l.schoonhoven@soton.ac.uk](mailto:l.schoonhoven@soton.ac.uk)  
43  
44

45 Raymond T.C.M. Koopmans, PhD, professor in elderly care medicine, especially long-term care  
46 Radboud university medical center, Radboud Institute for Health Sciences, Department of Primary and  
47 Community Care, Nijmegen, the Netherlands  
48  
49 and Joachim & Anna, Center for Specialized Geriatric Care, Nijmegen, the Netherlands  
50  
51 [raymond.koopmans@radboudumc.nl](mailto:raymond.koopmans@radboudumc.nl)  
52

53 Miranda G.H. Laurant, PhD, senior researcher and professor organization of care and services  
54 Radboud university medical center, Radboud Institute for Health Sciences, Scientific Center for Quality  
55 of Healthcare (IQ healthcare), Nijmegen, the Netherlands  
56  
57  
58  
59  
60

1  
2  
3 and HAN University of Applied Sciences, Faculty of Health and Social Studies, Nijmegen, the  
4 Netherlands

5 [miranda.laurant@radboudumc.nl](mailto:miranda.laurant@radboudumc.nl)  
6

7  
8 Keywords: case study, nursing home, nurse practitioner, physician assistant, substitution  
9

10  
11 Word count: 6913  
12  
13  
14  
15  
16  
17  
18  
19  
20  
21  
22  
23  
24  
25  
26  
27  
28  
29  
30  
31  
32  
33  
34  
35  
36  
37  
38  
39  
40  
41  
42  
43  
44  
45  
46  
47  
48  
49  
50  
51  
52  
53  
54  
55  
56  
57  
58  
59  
60

For peer review only

**Abstract****Introduction**

In developed countries, substituting physicians with nurse practitioners, physician assistants and nurses (physician substitution) occurs in nursing homes as an answer to the challenges related to the ageing population and the shortage of staff, as well as to guarantee the quality of nursing home care. However, there is great diversity in how physician substitution in nursing homes is modelled and it is unknown how it can best contribute to the quality of healthcare. This study aims to gain insight into how physician substitution is modelled, and whether it contributes to perceived quality of healthcare. Second, this study aims to provide insight into the elements of physician substitution that contribute to quality of healthcare.

**Methods and analysis**

This study will use a multiple-case study design that draws upon realist evaluation principles. The realist evaluation is based on four concepts for explaining and understanding interventions: context, mechanism, outcome, and context-mechanism-outcome configuration. The following steps will be taken: 1. Developing a theory; 2. Conducting seven case studies; 3. Analysing outcome patterns after each case and a cross-case analysis at the end; 4. Revising the initial theory.

**Ethics and dissemination**

The research ethics committee of the region Arnhem Nijmegen in the Netherlands concluded that this study does not fall within the scope of the Medical Research Involving Human Subjects Act (WMO) (registration number 2015/1914). Before the start of the study, the Board of Directors of the nursing home organisations will be informed verbally and by letter and will also be asked for informed consent. In addition, all participants will be informed verbally and by letter and will be asked for informed consent. Findings will be disseminated by publication in a peer-reviewed journal, international and national conferences, national professional associations and policy partners in national government.

**Strengths and limitations of this study**

- This is the first case study applying a realist evaluation approach in seven cases to gain insight into what mechanism of substituting physicians with nurse practitioners, physician assistants or nurses in nursing homes contributes, in what context and in what respect, to perceived quality of healthcare.
- This case study will build on a theory based on a literature and a focus group study conducted by the research team; the theory is presented in this article.
- All relevant stakeholders involved in physician substitution will be included and different data collection methods will be applied to provide a complete picture of each case which will be input for the cross-case analysis.
- This protocol may guide other researchers in conducting their multiple-case study according to realist evaluation principles.
- Seven cases will be included in this case study; therefore it might be that not all possible ways of modeling physician substitution in nursing homes are included.

## INTRODUCTION

Maintaining the quality of nursing home care in light of the ageing population and the shortages of staff is an important issue in developed countries. Physician substitution is one of the potential solutions used by nursing homes to deal with these challenges.<sup>1-3</sup> However, there is great diversity in how physician substitution in nursing homes is modelled and it is unknown how it can be done best to contribute the most to the quality of healthcare [Lovink et al. in preparation].

Physician substitution means shifting care from physicians to nurse practitioners (NPs), physician assistants (PAs), or registered nurses (RNs), also called mid-level providers. We use the term mid-level providers to refer to professionals with European Qualification Level five or higher.<sup>4</sup> Their introduction in nursing homes has happened for several reasons.

- 1) The population is ageing and in this ageing population, the prevalence of (chronic) diseases and multi-morbidity is also expected to increase.<sup>5</sup>

- 2) Societal reforms have shifted healthcare from the hospitals and nursing homes to the community.<sup>6</sup> This means that only patients requiring complex care will reside in nursing homes. As a consequence, attending physicians in nursing homes face heavy workloads.<sup>7</sup> In the Netherlands, nursing home physician specialists, called elderly care physicians (ECPs), are employed by the nursing home organisation.<sup>8-9</sup> This is a unique specialty that may contribute to the quality of healthcare.<sup>8-10-11</sup> However, there is also a high workload for ECPs in the Netherlands, and there are many vacancies.<sup>12</sup>

- 3) Relatively few medical students are pursuing careers in healthcare for older people.<sup>12-15</sup> By substituting physicians with mid-level providers, these threats to the quality of healthcare may be diminished.<sup>2</sup>

A systematic literature review showed that substituting physicians with mid-level providers in nursing homes appeared to achieve patient outcomes and process of care outcomes that were at least as good as care provided by physicians only.<sup>16</sup> In addition, a focus group study with care providers of Dutch nursing homes showed that mid-level providers not only substituted for the physicians, but that they had a surplus value, according to the respondents, because they contributed to quality of healthcare, provided patient-centred care and strengthened the care team [Lovink et al. in preparation]. However, the same study showed that there was great diversity in how physician substitution was modelled and there was no consensus on the optimal way to model physician substitution. Moreover, the results of this focus group study may be distorted by social desirability bias due to self reporting of activities [Lovink et al. in preparation]. To gain a more complete and in-depth insight into physician substitution in nursing homes, a multiple-case study will be carried out in seven nursing homes in the Netherlands. This paper describes the study protocol.

### Study aim

The aim of the study is to gain insight into how substitution of ECPs by mid-level providers is modelled, and whether it contributes to perceived quality of healthcare. Second, we aim to provide

1  
2  
3 insight into elements of substitution of ECPs by mid-level providers that contribute to quality of  
4 healthcare (i.e. elements that contribute to an optimal model of physician substitution). In order to do  
5 so, the following research questions will be answered:  
6  
7

8 Research questions:

- 9  
10
- How is substitution of ECPs by mid-level providers modelled in different nursing homes?
  - What mechanism of substitution of ECPs by mid-level providers contributes, in what context and in what respect, to perceived quality of healthcare for nursing home patients?
  - What are elements that contribute to an optimal model of substitution of ECPs by mid-level providers?
- 11  
12  
13  
14  
15  
16  
17

## 18 DESIGN

19 The study will use a descriptive and partial explanatory multiple-case study design that draws upon  
20 realist evaluation principles.<sup>17 18</sup> The realist evaluation is useful for studying complex interventions  
21 when the aim of the study is not determining whether an intervention is effective or not, but instead to  
22 explain how and why it is effective, under what conditions, and for which groups of patients.<sup>19</sup> The  
23 realist evaluation is based on four concepts for explaining and understanding interventions: context  
24 (C), mechanism (M), outcome (O), and the context-mechanism-outcome (CMO) configuration. The  
25 realist evaluation is a pragmatic alternative to the experimental paradigm, given the impossibility of  
26 controlling complex interventions, such as physician substitution.<sup>19</sup> The following steps will be taken in  
27 this study:  
28  
29  
30  
31

1. Developing an initial theory (see below)
  2. Conducting seven case studies (collecting data on (appropriate) contexts, mechanisms and outcomes)
  3. Analysing outcome patterns after each case and a cross-case analysis at the end to see which can and which cannot be explained by the initial theory
  4. Revising understanding of CMO-configurations as a prelude to a further theory refinement.
- 32  
33  
34  
35  
36  
37  
38  
39  
40  
41

## 42 INITIAL THEORY SUBSTITUTION

43 In the following paragraphs, a theory of substitution of ECPs by mid-level providers in nursing homes  
44 will be presented according to the concepts of the realist evaluation.<sup>18</sup> Realist evaluation starts with  
45 eliciting and formalizing the theory to be tested. In addition, data will be collected and analysed, and  
46 the theory will be tested.<sup>19</sup> The initial theory presented is partly based on literature and partly on a  
47 focus group study we performed [Lovink et. al. in preparation]. In the focus group study, ECPs, NPs,  
48 PAs, and RNs (in total, 35 care providers) working in Dutch nursing homes were interviewed about the  
49 topic of physician substitution. The theory is a preliminary theory that will be adjusted and further  
50 developed in this case study. Below, it is presented under the headings Mechanisms, Contexts and  
51 Outcomes, starting with the heading Mechanisms, as this is the core of CMO-configurations. This  
52 theory (depicted in Figure 1) will be the starting point for the case study. If no reference is provided the  
53 information is based on our focus group study [Lovink et. al. in preparation].  
54  
55  
56  
57  
58  
59  
60

## Mechanisms

*Mechanism describes what it is about the intervention that brings about any effect.<sup>19</sup> Below are presented three head mechanisms. Figure 1 presents the underlying mechanisms.*

### Mechanism 1:

Based on their education and previous experience, mid-level providers are able to substitute for ECPs largely autonomously with at least maintenance of the quality of healthcare.

In the Netherlands, NPs were introduced in the late 1990s.<sup>20</sup> NPs are RNs with completed advanced education and clinical training on a master's level. They can provide a wide range of preventive, chronic healthcare and acute healthcare in a wide variety of clinical areas. While NPs combine nursing care with medical care, PAs mainly provide medical care.<sup>21</sup> PAs were introduced in the Netherlands in the early 2000s.<sup>22</sup> The PA course is a graduate program that leads to a master's degree and the program consists of a didactic phase and a clinical phase.<sup>22</sup> PAs work across a wide range of healthcare settings and in a wide variety of clinical areas. Following the example of general practices, more and more practice nurses started working in nursing homes in the Netherlands the last decades.<sup>23</sup> Practice nurses in nursing homes are nurses with additional training on older patients and the nurse's role in nursing homes. NPs, PAs and practice nurses all have the potential to reduce ECPs' workload and to contribute to the quality of healthcare in the unique multi-disciplinary nursing home setting in the Netherlands.<sup>24 25</sup>

NPs and PAs are able to substitute for ECPs.<sup>26-29</sup> PAs mostly substitute for ECPs to a large extent with regard to medical tasks, while the extent to which NPs can substitute for ECPs varies from a smaller to a larger extent. In addition, the level of autonomy of the NP/PA in the medical domain varies from one nursing home to another.<sup>30</sup> PAs mostly have a high level of autonomy; they perform most of their tasks independent of an ECP. The level of autonomy of NPs varies. NPs/PAs can work at all different units of a nursing home: units for patients with physical disabilities, dementia special care units, or geriatric rehabilitation units, or a combination of different units. Tasks that can be replaced from ECPs to NPs or PAs are: admission of patients, assessment, and management and follow-up of patients with a variety of chronic conditions, as well as acute conditions, determining patients' care plan, visits, multidisciplinary meetings, family meetings, procedures such as prescription of medication, referral to other disciplines, out of hours care etc.<sup>25 26 28</sup> Furthermore, some NPs/PAs in nursing homes work as a specialist at the organisational level.<sup>21 25</sup> Some PAs work as a specialist in addition to their work as a generalist, while some NPs only work as a specialist. Examples of specialist areas are: wound care, pressure ulcers and diabetes mellitus.

Practice nurses can also substitute for ECPs.<sup>25</sup> The extent to which they can be a substitute on medical tasks and their level of autonomy in the medical domain is mostly lower than is the level of autonomy of NPs/PAs. Practice nurses mostly work at units for patients with physical disabilities or dementia special care units. They may work at one or more units in the organisation and they may

1  
2  
3 work as a specialist at the organisational level.<sup>25</sup> Tasks they can perform are: visits (in preparation for  
4 the ECP's visit), triage, wound rounds etc.<sup>25</sup>  
5  
6

7 Although the above indicates that physician substitution in nursing homes is possible, it also indicates  
8 that there is great diversity in how it is modelled and the elements of an optimal model are unknown.  
9

#### 10 11 Mechanism 2:

12 Physician substitution always is a collaboration between the mid-level provider and the ECP to  
13 guarantee quality of healthcare. The role of the ECP changes due to this collaboration.  
14

15  
16  
17 The level of collaboration between mid-level providers and the ECP varies. In some cases, the NP/PA  
18 has structural meetings with the ECP, while in other cases, the NP/PA only consults with the ECP if  
19 needed <sup>25 28</sup>. Practice nurses perform most of their tasks under supervision of ECPs.<sup>25</sup> Trust and a  
20 'personal click' seem to be important factors for a successful collaboration.  
21

22  
23  
24 By shifting care to mid-level providers, the ECPs can spend more time on complex care or special  
25 areas of attention, such as palliative care. For less complex care, the role of the ECPs will become  
26 more of a coordinating role due to substitution of ECPs by mid-level providers. Furthermore, the ECPs  
27 are able to provide care to older adults living at home as a consultant for the general practitioner.  
28 Although physician substitution releases the burden on ECPs during the day, the burden during  
29 evening, night and weekend shifts may increase because, in most cases, mid-level providers are  
30 employed instead of an ECP but they do not participate in these off-hours shifts (resulting in the same  
31 number of shifts with fewer people).  
32  
33  
34

#### 35 36 Mechanism 3:

37 Mid-level providers have a different way of working and they perform additional tasks compared to  
38 ECPs, which may lead to an increased quality of healthcare.  
39

40  
41  
42 During the performance of their tasks, mid-level providers show, to a more or lesser extent, the  
43 following characteristics: closeness to the patient/family, strengthening of the care team, and acting as  
44 a bridge between the ECP and the care team and the patient or the family.<sup>21 25 28 30</sup> NPs and practice  
45 nurses show these characteristics more than do PAs.<sup>20</sup> In addition to the patient-related tasks, mid-  
46 level providers perform non-patient-related tasks as well, such as: teaching and coaching of the care  
47 team, innovation of healthcare, and innovation of the organisation of healthcare.<sup>25-30</sup>  
48  
49  
50

#### 51 **Contexts**

52 *The context are those features of the conditions that are relevant to the operation of the mechanism.*<sup>19</sup>  
53  
54

55  
56 The factors that influence the level of physician substitution and the role of the mid-level provider in  
57 nursing homes can be classified according to the seven domains of the 'Tailored Implementation for  
58  
59  
60

1  
2  
3  
4  
5  
6  
7  
8  
9  
10  
11  
12  
13  
14  
15  
16  
17  
18  
19  
20  
21  
22  
23  
24  
25  
26  
27  
28  
29  
30  
31  
32  
33  
34  
35  
36  
37  
38  
39  
40  
41  
42  
43  
44  
45  
46  
47  
48  
49  
50  
51  
52  
53  
54  
55  
56  
57  
58  
59  
60

Chronic Diseases' (TICD) checklist: 1) organisational factors, 2) individual professional factors, 3) patient factors, 4) guideline factors, 5) incentives and resources, and 6) social, political, and legal factors.<sup>16 30 31</sup> The seventh domain, 'professional interactions', is seen as part of the mechanism.

#### Organisational factors

Organisational factors that influence the level of physician substitution are the demographics of an organisation (e.g. number of patients), the vision of the organisation on physician substitution and how the mid-level provider is positioned in the organisation. For example, in an organisation with a shortage of ECPs, the role of the mid-level provider (to substitute the ECP) will be mainly focused on care delivery, which might be different than in an organisation without a shortage of ECPs, where the role of the mid-level provider may be more focused on quality improvement. In addition, whether or not mid-level providers and ECPs form fixed couples or rotate influences the consistency of care and the level of trust in one another.<sup>16</sup> Furthermore, some nursing homes introduce the mid-level provider in their organisation without a clear vision of their role; this may hinder the implementation of physician substitution as the role of the mid-level provider is not clear to ECPs. When mid-level providers are positioned in the nursing team, their role will be different from cases in which mid-level providers are positioned in the medical team next to the ECP, which facilitates physician substitution. Another important factor is that the position of the mid-level provider needs time to embed in a nursing home organisation.

#### Individual professional factors

Individual professional factors influence the role of the mid-level provider, especially the characteristics of the mid-level provider him/herself, of the ECP, and of the care team and other care providers. Characteristics of the mid-level provider him/herself are, for example, type of mid-level provider (NP, PA or practice nurse: see Mechanisms), background and level of experience. A pioneering spirit, ability to work independently, thirst for knowledge, and willingness to shape his or her own practice contribute to successful implementation of the mid-level provider position.<sup>16</sup> In addition, the willingness of the ECP to substitute tasks shapes the role of the mid-level provider.<sup>16</sup> An example of a characteristic of the care team, which influences the role of midlevel providers, the level of education. If this level is low, the mid-level provider will be inclined to work in the nursing domain instead of the medical domain. The level at which other care providers accept the mid-level provider also influences their role and the ease of performing their role.

#### Patient factors

Characteristics of the patients that influence the role of midlevel provider are, for example, their type of care needs. In the Netherlands, there is a difference between units for patients with physical disabilities and dementia special care units, and geriatric rehabilitation units are often part of a nursing home.<sup>24</sup> Mid-level providers may work at all units; however, the type of unit determines their tasks. Another characteristics of patients can include their familiarity with the function of mid-level providers; if they are not familiar, they might demand to be taken care of by an ECP.<sup>16</sup>



#### Guideline factors

Substitution of ECPs by mid-level providers is strongly influenced by the agreements, or lack thereof, made regarding substitution. Examples of agreements are vision on physician substitution, job description of the mid-level provider, collaborative agreements, and treatment protocols that are adjusted to the mid-level provider based on the scope of practice.

#### Incentives and resources

Appropriate financing is an important factor for successful implementation of the mid-level provider in nursing homes.<sup>16</sup> This includes financing at the organisational level – how the employment of a mid-level provider is reimbursed – and at professional level, remuneration that is appropriate for the task and responsibilities of the mid-level provider.

#### Social, political, and legal factors

The support of the mid-level provider as an ECP substitute from the professional association of ECPs is an important factor related to the acceptance of mid-level providers. Political and legal factors are also context features of physician substitution. These factors determine the boundaries of mid-level providers' authorization and they determine when, how, where, and by whom healthcare for older people is provided.<sup>16</sup> In the Netherlands, NPs and PAs are authorized to indicate and perform some of the so-called 'reserved procedures' described in the Individual Health Care Professions Act, which were initially only reserved for physicians. Furthermore, NPs and PAs are not authorized to sign death certificates.<sup>32 33</sup> Practice nurses are only allowed to perform reserved procedures after instructions from a physician, NP or PA. In addition, the ageing population and the societal reforms that shift care from the hospital/nursing home to the community influence the way mid-level providers are employed.

#### **Outcomes**

*Outcome patterns are comprised of the intended and unintended consequences of the intervention.*<sup>19</sup>

The outcomes of physician substitution will be discussed as outcomes related to quality of healthcare based on the six concepts of quality of healthcare defined by the Ministry of Health, Welfare and Sport of the Netherlands (2014) and the World Health Organisation (2006): (1) effectiveness, (2) efficiency, (3) patient safety, (4) accessibility, (5) timeliness, and (6) target population directed.<sup>34 35</sup>

#### Effectiveness

*Effectiveness refers to delivering healthcare that is adherent to an evidence base and results in improved health outcomes for individuals and communities, based on needs.*<sup>34 35</sup>

Substitution of ECPs by NPs or PAs seems to have a neutral effect on or cause a reduction in the number of hospital admissions, hospital days, emergency department visits, mortality, and number of medications used.<sup>16</sup> The effectiveness of substitution of ECPs by practice nurses is unknown.

### Efficiency

*Efficiency refers to healthcare that avoids waste.*<sup>34 35</sup>

Physician substitution appears to have a mixed effect on healthcare utilization (costs).<sup>16</sup> However, if mid-level providers perform the same activities as an ECP, they do this at lower costs because of their lower salary. In contrast to this, mid-level providers hardly ever fully replace ECPs.<sup>25</sup> The NP may supply a time savings for the ECP of between 40 and 88% and the practice nurse, between 35 and 72%.<sup>25</sup> The time savings a PA supplies is unknown. It is unknown how the lower costs (salary) of mid-level providers relate to the substitution percentage in terms of efficiency. In addition, mid-level providers contribute to efficiency as they work in a structured manner and take into account the organisation of care while planning care activities.

### Patient safety

*Patient safety refers to avoiding harm during healthcare interventions.*<sup>34 35</sup>

Mid-level providers seem to be able to substitute for ECPs in terms of maintaining patient safety within their boundaries and if an ECP is available for support if needed. In addition, mid-level providers might detect medical problems early because they are regularly present on the units. They might also focus on the quality policy, such as developing protocols and stimulating working according to these protocols.<sup>25</sup>

### Accessibility

*Accessibility refers to how easily someone obtains access to healthcare, which does not vary in quality because of personal characteristics such as gender, race, ethnicity, geographical location, or socioeconomic status.*<sup>34 35</sup>

Mid-level providers may enhance the accessibility of medical care. They are easily accessible to the care team as well as for patients and family because they are often present at the unit, and have an open attitude.<sup>25</sup>

### Timeliness

*Timeliness refers to providing healthcare in time.*<sup>34 35</sup>

NPs appear to provide as many progress visits as ECPs, while NPs perform more acute visits.<sup>16</sup> In addition, mid-level providers may have/take more time for direct patient care than do ECPs.

### Target population directed

*Target population directed refers to respecting the preferences, needs, and values of the target group.*<sup>34 35</sup>

Mid-level providers may contribute to target population directness because they know their patients very well, involve family in decisions, and communicate with patients and family on their own level.

### Other outcomes ('indirect outcomes'<sup>19</sup>)

1  
2  
3 Mid-level providers may contribute to the continuity of care as they work at one place for a long time.<sup>25</sup>  
4 In addition, the fact that mid-level providers perform different tasks and have a different way of working  
5 than ECPs may lead to better quality of healthcare, but also to other outcomes. For example, coaching  
6 of the care team during a training, may lead to increased knowledge of the care team. As the goal of  
7 this study is to describe physician substitution, we did not focus explicitly on 'indirect' outcomes, but  
8 they might be discussed in answers to our open interview questions and then will be included in the  
9 analysis.  
10  
11

## 12 13 **METHODS**

### 14 **Case selection**

15  
16 The goal of a case study is not statistical generalization, but analytic generalization. This means that  
17 the initially developed theory is used as a template with which the empirical results of the case study  
18 are compared. Each case must be adequately selected so that it either (1) predicts similar results  
19 (literal replication) or (2) predicts contrasting results for anticipated reasons (theoretical replication)<sup>17</sup>.  
20 In this study, each case will be comprised of one mid-level provider in a nursing home organisation.  
21 The first mechanism: mid-level providers can substitute for ECPs largely autonomously, at least in  
22 terms of maintenance of quality of healthcare. This is the mechanism we are most interested in and  
23 therefore, this mechanism will guide the case selection. The main goal of the selection is to select  
24 cases in which the mid-level provider works mainly in the medical domain. To gain insight into whether  
25 or not mid-level providers can substitute for ECPs largely autonomously, at least in terms of the  
26 maintenance of quality of healthcare, we will seek variation on the level of autonomy. We will also  
27 seek variation on other factors of the first mechanism. See Table 1 for a description of the selection  
28 criteria.  
29  
30  
31  
32  
33  
34  
35  
36  
37  
38  
39  
40  
41  
42  
43  
44  
45  
46  
47  
48  
49  
50  
51  
52  
53  
54  
55  
56  
57  
58  
59  
60

Table 1 Selection criteria

| Inclusion criteria                                                                                                                                                                                                                                                                                                                                                                                                                                                                                                                                                                                                                                                                                                                                                                                                                                                                                         |
|------------------------------------------------------------------------------------------------------------------------------------------------------------------------------------------------------------------------------------------------------------------------------------------------------------------------------------------------------------------------------------------------------------------------------------------------------------------------------------------------------------------------------------------------------------------------------------------------------------------------------------------------------------------------------------------------------------------------------------------------------------------------------------------------------------------------------------------------------------------------------------------------------------|
| <ul style="list-style-type: none"> <li>• <b>More than 65% of the patient related tasks the mid-level provider performs should be in the medical domain<sup>**</sup>, according to the mid-level provider's own estimation</b></li> <li>• The mid-level provider should be employed for minimal 0,6 Full Time Equivalents</li> <li>• 80% or more of the patients the mid-level provider takes care of should be 65 years or older</li> <li>• If possible (depending on the available cases) the mid-level provider should be working for more than 2 years as a mid-level provider in a nursing home</li> </ul>                                                                                                                                                                                                                                                                                             |
| Maximum variation criteria                                                                                                                                                                                                                                                                                                                                                                                                                                                                                                                                                                                                                                                                                                                                                                                                                                                                                 |
| <ul style="list-style-type: none"> <li>• <b>Level of autonomy<sup>***</sup> (&gt;70%/&lt;70%), in the performance of patient related tasks in the medical domain, according to the mid-level provider's own estimation</b></li> <li>• Working as a generalist, or a specialist, or both</li> <li>• Working at ward level, or at organisation level, or both</li> <li>• Working at ward for patients with physical disabilities, dementia special care unit, or geriatric rehabilitation unit, or a combination of different units</li> <li>• Type of mid-level provider (NP/PA/practice nurse)</li> <li>• Male, female</li> </ul>                                                                                                                                                                                                                                                                          |
| <p><i>*Patient related tasks: Direct patient related tasks and indirect patient related tasks:<br/>Direct patient related tasks: tasks that are performed in presence of/with the patient and/or family.<br/>Indirect patient related tasks: tasks that are performed for the patient, but not per se in presence of the patient.</i></p> <p><i>**Medical domain: Medical examination of the patient (history, physical examination etc.), medical diagnostics, formulate a medical treatment plan, indicate and/or perform medical procedures (prescription of medication, perform surgical procedures, give injections etc.).</i></p> <p><i>***Autonomy: Independent indication and performance of patient related tasks in the medical domain. The performance can also be delegated to another care provider. Consultation with an ECP is possible, but the mid-level provider is responsible.</i></p> |

The professional associations of NPs, PAs, and practice nurses in nursing homes will be asked to distribute a questionnaire among their members (NPs: 224, PAs: 30, practice nurses: 180). This questionnaire contains questions about the inclusion criteria and the maximum variation criteria. Reminders will be used to enhance the response rate. The completed questionnaires will be used to select seven cases. The number of seven was chosen to create a balance between depth and variation in the study with the given budget and time available.

### Setting

The setting will be seven nursing home organisations in the Netherlands that have one or more locations, and the (different) unit(s) where the mid-level providers work.

### Participants

The participants will be:

- The mid-level provider
- The manager that has been/is involved the most in the decision to substitute for ECPs
- The supervisor/manager of the mid-level provider
- The head ECP
- All ECPs with whom the mid-level provider collaborates directly

- Five nurses/healthcare assistants/nursing team leaders with whom the mid-level provider collaborates
- Five patients the mid-level provider takes care of and their informal caregiver (at dementia special care units; only informal caregivers will participate)
- Patient council, family council or patient-family council

#### **Data collection**

Before the start of the study, the Board of Directors of the nursing home organisations will be informed verbally and by letter and they will be asked to provide informed consent for the entire study. In each case, two researchers (MLO and IM) will collect all data in two weeks. Data collection will consist of observations, interviews, questionnaires and documents (see Table 2). All interviews will be audio-taped and transcribed verbatim. Data will be collected between September 2015 and January 2017.

Table 2 Data collection

| Sources of data                                                                                      | Data                                                                                                                                                                                                                                                                                                                                                                                                                                                                                                                                                   |
|------------------------------------------------------------------------------------------------------|--------------------------------------------------------------------------------------------------------------------------------------------------------------------------------------------------------------------------------------------------------------------------------------------------------------------------------------------------------------------------------------------------------------------------------------------------------------------------------------------------------------------------------------------------------|
| Mid-level provider<br>(3 NPs, 2 PAs and 2 practice nurses)                                           | <ul style="list-style-type: none"> <li>• Observation (4x4 hours)</li> <li>• Questionnaire</li> <li>• Interview (after observation)</li> </ul>                                                                                                                                                                                                                                                                                                                                                                                                          |
| Manager involved in physician substitution                                                           | <ul style="list-style-type: none"> <li>• Questionnaire</li> <li>• Interview</li> </ul>                                                                                                                                                                                                                                                                                                                                                                                                                                                                 |
| Supervisor/manager of the mid-level provider                                                         | <ul style="list-style-type: none"> <li>• Interview</li> </ul>                                                                                                                                                                                                                                                                                                                                                                                                                                                                                          |
| ECP with whom the mid-level provider collaborates most intensely                                     | <ul style="list-style-type: none"> <li>• Observation (2x2 hours)</li> <li>• Questionnaire</li> <li>• Interview (after observation)</li> </ul>                                                                                                                                                                                                                                                                                                                                                                                                          |
| ECPs with whom the mid-level provider collaborates directly                                          | <ul style="list-style-type: none"> <li>• Questionnaire</li> <li>• Interview</li> </ul>                                                                                                                                                                                                                                                                                                                                                                                                                                                                 |
| Head of the ECPs                                                                                     | <ul style="list-style-type: none"> <li>• Interview</li> </ul>                                                                                                                                                                                                                                                                                                                                                                                                                                                                                          |
| Five nurses/healthcare assistants/nursing team leaders with whom the mid-level provider collaborates | <ul style="list-style-type: none"> <li>• Interview</li> </ul>                                                                                                                                                                                                                                                                                                                                                                                                                                                                                          |
| Five patients the mid-level provider takes care of and/or their informal caregiver                   | <ul style="list-style-type: none"> <li>• Interview</li> </ul>                                                                                                                                                                                                                                                                                                                                                                                                                                                                                          |
| Patient council, family council or patient-family council                                            | <ul style="list-style-type: none"> <li>• Focus group interview</li> </ul>                                                                                                                                                                                                                                                                                                                                                                                                                                                                              |
| Documents                                                                                            | <ul style="list-style-type: none"> <li>• Mission and vision of the organisation;</li> <li>• Mission and vision of the organisation on physician substitution;</li> <li>• Job description of all mid-level providers in the organisation and of the ECP;</li> <li>• Working arrangements for the mid-level provider and the ECP;</li> <li>• Treatment protocols for the mid-level provider;</li> <li>• Annual report of the organisation of the preceding year;</li> <li>• Information about the mid-level provider for patients and family.</li> </ul> |

#### Informed consent

All participants who will be interviewed will be informed verbally and by letter and will be asked to provide informed written consent. A contact person (e.g. manager, nursing team leader) and/or the mid-level provider will assist in identifying all participants. The contact person will draw a random sample of five nurses/healthcare assistants/nursing team leaders. With the help of the contact person and/or the mid-level provider, patients will be selected for an interview. Five patients who are 65 years or older and mentally competent (according to the judgement of the contact person or the mid-level provider) will be asked for an interview, together with his/her informal caregiver. On dementia special care units, only the informal care giver will be interviewed. In addition, the patient/family council will be contacted via the mid-level provider and the members will be invited for a focus group interview, as well as to sign an informed consent.

Before the start of the study, all patients, informal caregivers and care providers of the units where observations will take place, will be informed about the study and the observations, so they have the

1  
2  
3 chance to object to the observation in advance. The method for informing participants about the  
4 observations will be determined in collaboration with our contact person and the Board of Directors.  
5 During the observations, all patients that the mid-level provider and the ECP visit will receive brief  
6 information about the study and then will be verbally asked for informed consent to observe the  
7 contact with the mid-level provider or ECP (i.e. a written informed consent form will not be used). This  
8 will be the same for all care providers that the mid-level provider/ECP has contact with during the  
9 observations.  
10  
11

### 12 13 Observations

14  
15 Observational guides are developed based on the framework depicted in Figure 1. The mid-level  
16 provider will be observed for 4 days x 4 hours within the 2 weeks period and the ECP for 2 days x 2  
17 hours within the 2 weeks period. These time periods have been chosen as it is anticipated that an  
18 observation of 2 or 4 hours gives a good impression of the tasks the mid-level provider and the ECP  
19 perform. By planning multiple observations the chance of only observing exceptional situations is  
20 diminished. The mid-level provider will be observed for a longer period of time as he/she is the subject  
21 of the study. In addition, within the observation of the mid-level provider all scheduled contact  
22 moments between the mid-level provider and the ECP will be observed. The ECP will be observed  
23 The ECP will be observed to discover differences or similarities in performing the tasks they have in  
24 common with the mid-level provider. Observations will be planned in advance based on indication of  
25 the mid-level provider and the ECP which time they perform the most patient related tasks. Both  
26 researchers will carry out half of the observations. The role of the researcher during observations will  
27 be as a non-participant.<sup>36</sup> In non participant observation it is important to find a balance between  
28 building trust among the participants and 'going native'. The relatively short observation periods will  
29 prevent the observers 'going native'. The observational instrument consists of two parts. In one part,  
30 the researcher will write down what tasks the mid-level provider performs and how he/she performs  
31 these tasks. In the second part, the researcher will write down a general impression on topics such as  
32 level of autonomy and care for the client/family after each observation moment. The field notes in the  
33 first part of the observation instrument can be used to fill out the second part. After each observation  
34 moment, the researcher will directly type out the field notes on a computer.  
35  
36  
37  
38  
39  
40  
41  
42  
43

### 44 Interviews and questionnaires

45  
46 The interview guides will be developed based on the framework depicted in Figure 1, with a different  
47 focus for each group of participants. The interview with the mid-level provider will be very extensive  
48 and will focus on all relevant items; the interview with the manager will mainly focus on the vision of  
49 the organisation on physician substitution and the interview with patients and/or their informal  
50 caregiver will mainly focus on their needs and their experiences with the mid-level provider. Tasks and  
51 responsibilities will be collected via a questionnaire for the mid-level provider and the ECPs with whom  
52 the mid-level provider collaborates directly. The specific outcomes (see Figure 1) will be inquired about  
53 in the interviews with the mid-level provider, the ECPs with whom the mid-level providers collaborate  
54 directly, and the nurses/healthcare assistants/nursing team leaders with whom the mid-level provider  
55  
56  
57  
58  
59  
60

collaborates. Participants will be asked to compare the mid-level provider and the ECP on all of these outcomes. In the other interviews, outcomes will be discussed in general. In addition, all participants, except for the patients and/or their informal caregiver and the patient/family council, will be asked whether they perceive the way physician substitution is modelled as being optimal and why they think so or not. They will also be asked whether they would recommend it to other organisations and why they would or would not. After analysis of each case, a member check (confirmatory focus group interview) will be carried out. See Data Analysis for further details.

## DATA ANALYSIS

Data will be analysed in the five weeks directly after data collection of each case. At completion of the initial analysis of all cases at the end of the study, a cross-case analysis will be carried out.

The data analysis will rely on theoretical propositions and explanation building. This means that the theoretical propositions (the initial theory) that led to this case study will be followed and that the analysis aims to answer the questions: (1) how is substitution of ECPs by mid-level providers modelled in different nursing homes?, (2) what mechanism of substitution of ECPs by mid-level providers contributes, in what context and in what respect, to perceived quality of healthcare for nursing home patients?, and (3) what are elements that contribute to an optimal model of substitution of ECPs by mid-level providers?

### Single case analysis

#### Qualitative analysis

The tasks in the first part of the observation instrument will be coded according to the possible tasks described in advance. However, there is also space for tasks that are not described in advance. Each observation moment will be coded by one researcher and checked by the other.

The two researchers who collect the data (MLo and IM) will compare their notes in the second part of the observation instrument – the general impression. Differences will be discussed, and finally, they will make an assembly of the different forms. If no consensus can be reached, they will ask clarification during the member check (see below).

Four researchers (MLo, IM, AvV and LvD) will qualitatively analyse the interviews and documents. MLo will code all interviews. In the first case, a second researcher will independently code all interviews. If sufficient consensus is reached in the coding, for the next cases, half of the interviews will be coded independently by a second researcher; for the other half, MLo's codes will be checked by another researcher. The computer program ATLAS.ti will be used for analysis. Content analysis will be used to analyse the data.<sup>37</sup> This is a method to attain both condensed and broad descriptions of a phenomenon by analysing text data.<sup>37</sup> The developed theory of context, mechanism, and outcome will be tested using deductive coding. This means that a structured categorization matrix based on Figure



1  
2  
3 1 will be used. However, aspects that do not fit the categorization matrix will be used to create new  
4 categories based on the principle of inductive content analysis.<sup>37</sup>  
5  
6

7 The researchers who collect the data will use the method of 'outlining the main message'.<sup>38</sup> The  
8 researchers will pretend that the deadline to hand in the final case description is imminent and they will  
9 ask themselves the question: how would the main message of this case be formulated.<sup>38</sup> This question  
10 focuses the researcher to think about the content of the result section. Both researchers will do this  
11 independently during analysis and they will compare and discuss their main message. In addition, they  
12 will check their main message with the data collected.  
13  
14

#### 15 16 17 Quantitative analysis

18 The questionnaires and the quantitative parts of the interviews (demographic data) will be  
19 quantitatively analysed. The computer program SPSS Statistics 20 will be used for analysis. Data will  
20 be analysed using descriptive statistics.  
21  
22

#### 23 24 Member check

25 For each individual case, MLo will write a case description and the other researchers will check it. This  
26 description will build on the theoretical propositions made at the start of this case study. This  
27 description will be used for a member check within the case.<sup>38 39</sup> The mid-level provider, the ECP that  
28 has been observed, the manager involved in physician substitution, the manager/supervisor of the  
29 mid-level provider and two members of the care team will be asked to read the case description. In a  
30 focus group, these participants will be asked whether the case description is an accurate description of  
31 their case and clarification on the parts that turned out to be unclear will be asked. The member check  
32 has some drawbacks, such as participants struggling with abstract synthesis, participants that want to  
33 change their initial response and participants with different views on the same data.<sup>40</sup> To face these  
34 drawbacks, a focus group will be organised so that the interaction process can provide additional  
35 information, helping to make it clear why someone struggles with abstract synthesis, why someone  
36 has changed his or her mind or why participants have different views. All of this information will enrich  
37 the case description. The information gathered during the focus group will be used to further develop  
38 the case description.  
39  
40  
41  
42  
43  
44

#### 45 46 **Cross-case analysis**

47 When the initial analysis of each case is completed, the process of realistic cumulation will begin.<sup>18</sup>  
48 This means a motion up and down the ladder of abstraction and specification; the data gathered will  
49 be used to further develop the 'abstract' theory of physician substitution in nursing homes. The cross-  
50 case analysis will go beyond the separate Cs, Ms and Os. For each case, the CMO-configurations will  
51 be determined based on the initial analysis. By answering questions like which elements of the  
52 mechanism and the context give what outcomes. These CMO-configurations will be developed at case  
53 level. Where outcomes are unknown, anticipated outcomes (in line with the collected data) will be  
54  
55  
56  
57  
58  
59  
60

1  
2  
3 formulated. In addition, CMO-configurations across cases will be determined.<sup>41 42</sup> At the end, these  
4 CMO configurations will help us answer the research questions.  
5  
6

### 7 **VALIDITY AND RIGOUR**

8 The trustworthiness of the study findings is based on the following four criteria: (a) credibility, (b)  
9 dependability, (c) confirmation, and (d) transferability.<sup>39</sup>  
10

- 11 • Credibility will be ensured by the selection of seven different cases according to inclusion  
12 criteria and maximum variation sampling. In addition all relevant stakeholders involved in  
13 physician substitution will be included and a member check will be performed in each case.  
14 The collection of different types of data, known as data triangulation, also contributes to the  
15 credibility. To diminish the observer effect<sup>36</sup>, the researchers will explain to the care provider  
16 being observed that there is no good or bad behaviour and that the goal of the observation is  
17 only to describe the case and not to judge the behaviour.  
18
- 19 • Dependability will be promoted by thoroughly analysing and involving all researchers in the  
20 cross-case analysis.  
21
- 22 • Confirmation will be enhanced by keeping a logbook on methodological issues, in addition to  
23 memos reflecting on their role during the observations and interviews. Both researchers are  
24 health scientists with a nursing background. They are aware of the fact that their background  
25 may cause them to focus more on the nursing domain than on the medical domain during data  
26 collection and analysis.  
27

28 During non-participant observations, it is a challenge to remain objective and not selective<sup>36</sup>.  
29 Dealing with this challenge starts with acknowledging that an observer can never be truly  
30 objective and will always be somewhat selective.<sup>43</sup> Objectivity will be enhanced through the  
31 collection of field notes from two researchers, observations during different moments,  
32 structured data collection, check of the observers' ideas on the main message relative to the  
33 collected data, discussions of the findings in the research team, and the member check.  
34

35 Prior to the start of the case study and the research proposal, the observation instruments  
36 were tested by the two researchers (MLO and IM) using an ECP and a NP, both for four hours.  
37 After the observations, they discussed and compared their field notes and discussed their role  
38 during observations. After this test, they made changes to the observation instruments, in  
39 addition to making decisions on the focus during observations (the mechanism) and on their  
40 role during observation (e.g. introduce oneself with a handshake). By performing the test, the  
41 researchers developed the observation instrument, as well as establishing themselves as a  
42 data collection instrument.  
43

- 44 • Transferability: a general description of the organisations that provides sufficient information to  
45 implement a similar role and model of care will be presented in the paper to be published.  
46  
47  
48  
49

### 50 **DISCUSSION**

51 This case study will provide insight into how substitution of ECPs by mid-level providers is modelled in  
52 different nursing homes and what mechanism contributes in what context and in what respect to  
53  
54  
55  
56  
57  
58  
59  
60

1  
2  
3 quality of healthcare for older people. In addition, it will give input for the most optimal model of  
4 physician substitution in nursing homes. As stated in the preliminary theory, the model might strongly  
5 depend on the context, so there might be no single best model. Furthermore, each model studied in  
6 this case study might have strong and weak parts. Therefore, the most optimal model (for a given  
7 context) might consist of a combination of parts of different models. Bryant and DiCenco developed  
8 the PEPPA framework which states that the role of an advanced practice nurses should be developed  
9 based on a needs assessment and clear goals, objectives and outcomes identified.<sup>44</sup> A model might  
10 be optimal if the role of a mid-level provider is developed in this manner. In addition to this framework  
11 this case study will provide some concrete examples of this general statement and concrete  
12 preconditions of implementing a mid-level provider.  
13  
14  
15  
16

17  
18 This study is conducted in the Netherlands and it is important to point out that the nursing home  
19 setting might differ from other countries. In the Netherlands multidisciplinary teams are employed by  
20 the nursing home organisations, including the ECP, physiotherapist, occupational therapist, speech  
21 therapist, dietician and psychologist.<sup>8 9 45</sup> This means that all these providers are full time present at  
22 the nursing home and not only on call. Worldwide the employment of a broad multidisciplinary team is  
23 unique, especially the presence of an ECP as a medical specialist in elderly care.<sup>7 45</sup> The cooperation  
24 between the Dutch ECPs and the relatively new mid-level providers will be influenced positively as  
25 well as negatively, as it is facilitated by the presences of the ECP, but possibly hindered by  
26 competition. The interaction between the ECP and the mid-level provider and how this interaction  
27 influences physician substitution is part of the current study in observations as well as in interviews;  
28 resulting in recommendations on how to strengthen the cooperation.  
29  
30  
31  
32  
33

34  
35 Besides the differences in the nursing home setting, there is also a huge difference in the extent of  
36 substitution of physicians by NPs and PAs between countries. As in other countries, PAs in the  
37 Netherlands mainly focus on the medical domain, while NPs combine the medical with the nursing  
38 domain. In the Netherlands, NPs and PAs are educated at the master's level, they have a protected  
39 title and are authorized to indicate and perform some of the so called 'reserved procedures', like  
40 prescribing medication and giving injections.<sup>32 33 46</sup> Research shows that in some countries (like  
41 Australia and the USA) NPs are able to substitute physicians like in the Netherlands, while in other  
42 countries (like France and Germany) they are not.<sup>47</sup> For PAs applies that like in the Netherlands they  
43 are also recognized in Australia, Canada, United Kingdom and the USA, but in these countries they  
44 are only allowed to work under a supervising physician.<sup>48</sup>  
45  
46  
47  
48  
49

50 This case study will build on a theory based on the literature and a focus group study conducted by  
51 the research team. The challenge of performing a case study with certain propositions is to keep an  
52 open mind while collecting data.<sup>17</sup> Although the theory will guide data collection and analysis, it must  
53 not confine the data collection and analysis process; there has to be room for alternative hypotheses.  
54 The research team will face this challenge by being aware of a vision that is too narrow during data  
55 collection and discussing the theory and alternative hypotheses in regular meetings. In this case study,  
56  
57  
58  
59  
60

1  
2  
3 all outcomes are perceived outcomes and no quantitative outcomes are measured. This should be  
4 taken into account while interpreting the results. It might be that we cannot 'complete' some CMO-  
5 configurations because the outcome of a certain mechanism in a certain context is not fully clear.  
6  
7 However, this case study will provide insight into the possible outcomes related to physician  
8 substitution in nursing homes, which might inform further research.  
9

10  
11 The results of this case study will inform care providers, managers and policy administrators in their  
12 decisions regarding how to substitute mid-level providers for ECPs in nursing homes in a way that  
13 contributes most to perceived quality of healthcare for older people.  
14

### 15 16 17 **Ethics and dissemination**

18 The research ethics committee of the region Arnhem Nijmegen in the Netherlands concluded that this  
19 study does not fall within the scope of the Dutch Medical Research Involving Human Subjects Act  
20 (WMO) (registration number 2015/1914). Before the start of the study, the Board of Directors of the  
21 nursing home organisations will be informed verbally and by letter. The Board of Directors will also be  
22 asked to provide informed consent for the entire study. In addition, all participants will be informed  
23 verbally and by letter and will be asked to provide informed consent. Findings will be disseminated by  
24 publication in a peer-reviewed journal, international and national conferences, national professional  
25 associations and policy partners in national government.  
26  
27  
28

### 29 30 31 **Authors' contributions**

32 AP, RK and MLa conceived the idea for the study and obtained funding. MLo, AP, AvV and MLa  
33 wrote the initial theory. MLo, AP, AvV, LS, RK and MLa designed the study. MLo drafted the  
34 manuscript for submission to *BMJ Open*. AP, AvV, LS, RK and MLa revised the manuscript. All  
35 authors read and approved the final manuscript.  
36  
37  
38

### 39 40 41 **Funding**

42 This study is part of a larger project on physician substitution in healthcare for older people. Funding of  
43 this project (number: 321580) was confirmed in August 2013 by the Ministry of Health, Welfare and  
44 Sport of the Netherlands. The funding body was not involved in the design of the study.  
45

### 46 47 48 **Competing interests**

49 The authors declare that they have no competing interests.  
50  
51  
52  
53  
54  
55  
56  
57  
58  
59  
60

## REFERENCES

1. Donald F, Martin-Misener R, Carter N, et al. A systematic review of the effectiveness of advanced practice nurses in long-term care. *J Adv Nurs* 2013;69:2148–61.
2. Caprio TV. Physician practice in the nursing home: collaboration with nurse practitioners and physician assistants. *Ann Longterm Care* 2006;14:17–24.
3. Intrator O, Miller EA, Gadbois E, et al. Trends in nurse practitioner and physician assistant practice in nursing homes, 2000–2010. *Health Serv Res* 2015; doi: 10.1111/1475-6773.12410.
4. Descriptors defining levels in the European Qualifications Framework (EQF). <https://ec.europa.eu/ploteus/en/content/descriptors-page>. Accessed 1 February 2016.
5. World Health Organisation: World report on ageing and health. 2015. [http://apps.who.int/iris/bitstream/10665/186463/1/9789240694811\\_eng.pdf?ua=1](http://apps.who.int/iris/bitstream/10665/186463/1/9789240694811_eng.pdf?ua=1). Accessed 16 November 2015.
6. van der Aa MJ, Evers SM, Klosse S, et al. [Reform of long-term care in the Netherlands: solidarity maintained?]. *Ned Tijdschr Geneesk* 2014;158:A8253.
7. Dimant J. Roles and responsibilities of attending physicians in skilled nursing facilities. *J Am Med Dir Assoc* 2003;4:231–43.
8. Koopmans RT, Lavrijsen JC, Zuidema SU. The physician's role in nursing homes: the Dutch solution. *Arch Intern Med* 2010;170:1406–7.
9. Koopmans RT, Lavrijsen JC, Hoek JF, et al. Dutch elderly care physician: a new generation of nursing home physician specialists. *J Am Geriatr Soc* 2010;58:1807–9.
10. Ouslander JG, Lamb G, Perloe M, et al. Potentially avoidable hospitalizations of nursing home residents: frequency, causes, and costs. *J Am Geriatr Soc* 2010;58(4):627–35.
11. Katz PR, Karuza J, Lima J, et al. Nursing home medical staff organisation: correlates with quality indicators. *J Am Med Dir Assoc* 2011;12:655–9.
12. Capaciteitsorgaan. The 2013 recommendations for medical specialist training. Utrecht; 2013.
13. Frank C, Seguin R, Haber S, et al. Medical directors of long-term care facilities: Preventing another physician shortage? *Can Fam Physician* 2006;52:752–3.
14. Hauer KE, Durning SJ, Kernan WN, et al. Factors associated with medical students' career choices regarding internal medicine. *JAMA* 2008;300:1154–64.
15. Petterson SM, Liaw WR, Phillips RL, Jr., et al. Projecting US primary care physician workforce needs: 2010–2025. *Ann Fam Med* 2012;10:503–9.
16. Lovink MH, Persoon A, Koopmans RT, et al. Effect of substituting nurse practitioners, physician assistants or nurses for physicians concerning healthcare for the aging population: a systematic literature review. *J Adv Nurs* 2016. Accepted for publication January 2017
17. Yin RK. Case study research. Design and methods. Los Angeles: SAGE; 2014.
18. Pawson R, Tilley N. Realistic evaluation. London: SAGE; 1997.
19. Pawson R, Tilley N. Realist evaluation. 2004. [http://www.communitymatters.com.au/RE\\_chapter.pdf](http://www.communitymatters.com.au/RE_chapter.pdf). Accessed 6 January 2015.
20. ter Maten-Speksnijder A, Gryndonck M, Pool A, et al. A literature review of the Dutch debate on the nurse practitioner role: efficiency vs. professional development. *Int Nurs Rev* 2014;61:44–54.
21. Laurant M, van der Camp K, Boerboom L, et al. Een studie naar functieprofielen, taken en verantwoordelijkheden van Physician Assistants en Verpleegkundig Specialisten. Nijmegen: Scientific Institute for Quality of Healthcare Radboudumc; 2014.
22. van Vught AJAH, van den Brink GTWJ, Harbert K, et al. Physician assistant profession. In: The Wiley Blackwell Encyclopedia of Health, Illness, Behavior, and Society. 2014: 1830–2. <http://www.platformzorgmasters.nl/publicatie/2013-2/>. Accessed 18 November 2015
23. Freund T, Everett C, Griffiths P, et al. Skill mix, roles and remuneration in the primary care workforce: who are the healthcare professionals in the primary care teams across the world? *Int J Nurs Stud* 2015;52:727–43.
24. Schols JM, Crebolder HF, van Weel C. Nursing home and nursing home physician: the Dutch experience. *J Am Med Dir Assoc* 2004;5:207–12.
25. Bloemendaal I, Albers D, de Kroon S, et al. Taakverschuiving bij de medische zorg vanuit het verpleeghuis. Utrecht: Prismant; 2009.
26. Bakerjian D. Care of nursing home residents by advanced practice nurses. A review of the literature. *Res Gerontol Nurs* 2008;1:177–85.

- 1  
2  
3  
4  
5  
6  
7  
8  
9  
10  
11  
12  
13  
14  
15  
16  
17  
18  
19  
20  
21  
22  
23  
24  
25  
26  
27  
28  
29  
30  
31  
32  
33  
34  
35  
36  
37  
38  
39  
40  
41  
42  
43  
44  
45  
46  
47  
48  
49  
50  
51  
52  
53  
54  
55  
56  
57  
58  
59  
60
27. Abdallah LM. EverCare nurse practitioner practice activities: similarities and differences across five sites. *J Am Acad Nurse Pract* 2005;17:355–62.
  28. Martin-Misener R, Donald F, Wickson-Griffiths A, et al. A mixed methods study of the work patterns of full-time nurse practitioners in nursing homes. *J Clin Nurs* 2014;24:1327–37.
  29. Abdallah L, Fawcett J, Kane R, et al. Development and psychometric testing of the EverCare Nurse Practitioner Role and Activity Scale (ENPRAS). *J Am Acad Nurse Pract* 2005;17:21–6.
  30. Wallenburg I, Janssen M, de Bont A. De rol van de Verpleegkundig Specialist en de Physician Assistant in de zorg. Een praktijkonderzoek naar taakherschikking in de tweede- en derdelijnszorg in Nederland. Rotterdam: Rotterdam Instituut Beleid & Management Gezondheidszorg Erasmus Universiteit Rotterdam; 2015.
  31. Flottorp SA, Oxman AD, Krause J, et al. A checklist for identifying determinants of practice: a systematic review and synthesis of frameworks and taxonomies of factors that prevent or enable improvements in healthcare professional practice. *Implement Sci* 2013;8:35.
  32. The Nurse Practitioner in the Netherlands. <http://venvnvs.nl/wp-content/uploads/sites/164/2015/08/2015-10-30-Factsheet-Nurse-Practitioner-Netherlands-2015.pdf>. Accessed 7 April 2016.
  33. Timmermans MJ, van Vught AJ, Wensing M, et al. The effectiveness of substitution of hospital ward care from medical doctors to physician assistants: a study protocol. *BMC Health Serv Res* 2014;14:43.
  34. Wat is kwaliteit? <http://www.nationaalkompas.nl/preventie/thema-s/kwaliteit-van-preventie/wat-is-kwaliteit>. Accessed 7 May 2015.
  35. World Health Organisation: Quality of care a process for making strategic choices in health systems. 2006. [http://www.who.int/management/quality/assurance/QualityCare\\_B.Def.pdf](http://www.who.int/management/quality/assurance/QualityCare_B.Def.pdf). Accessed 7 May 2015.
  36. Liu F, Maitlis S. Nonparticipant observation. In: Encyclopedia of Case Study Research. Edited by Mills AJ, Durepos G, Wiebe E. Thousand Oaks: Sage; 2010.
  37. Elo S, Kyngas H. The qualitative content analysis process. *J Adv Nurs* 2008;62:107–15.
  38. Boeije H. Analysis in qualitative research. London: Sage; 2010.
  39. Lincoln YS, Guba EG. Naturalistic inquiry. Beverly Hills: Sage; 1985.
  40. Sandelowski M. Rigor or rigor mortis: the problem of rigor in qualitative research revisited. *ANS Adv Nurs Sci* 1993;16:1–8.
  41. Punton M, Vogel I, Lloyd R. Reflections from a realist evaluation in progress: scaling ladders and stitching theory. *CDI Practice Paper* 2016;(Number 18).
  42. Abhyankar P, Cheyne H, Maxwell M, et al. A realist evaluation of a normal birth programme. *Evidence Based Midwifery* 2013;11:112–19.
  43. Mason J. Qualitative researching. London: Sage; 2002.
  44. Bryant-Lukosius D, Dicenso A. A framework for the introduction and evaluation of advanced practice nursing roles. *J Ad Nurs* 2004;48:530–40.
  45. Schols JM, Crebolder HFJM, van Weel C. Nursing home and nursing home physician: the Dutch experience. *J Am Med Dir Assos*. 2004;5:207–12.
  46. Maier CB. The role of governance in implementing task-shifting from physicians to nurses in advanced roles in Europe, U.S., Canada, New Zealand and Australia. *Health Policy*. 2015;119:1627–35.
  47. Maier CB, Aiken LH. Task shifting from physicians to nurses in primary care in 39 countries: a cross-country comparative study. *Eur J Public Health*. 2016;26:927–34.
  48. van Vught AJAH, van den Brink GTWJ, Harbert K, et al. Physician Assistant Profession. *The Wiley Blackwell Encyclopedia of Health, Illness, Behavior, and Society*. 2014;1830–2. <http://www.platformzorgmasters.nl/publicatie/2019-2/> Accesed 18 November 2015.

1  
2  
3  
4  
5  
6  
7  
8  
9  
10  
11  
12  
13  
14  
15  
16  
17  
18  
19  
20  
21  
22  
23  
24  
25  
26  
27  
28  
29  
30  
31  
32  
33  
34  
35  
36  
37  
38  
39  
40  
41  
42  
43  
44  
45  
46  
47  
48  
49  
50  
51  
52  
53  
54  
55  
56  
57  
58  
59  
60

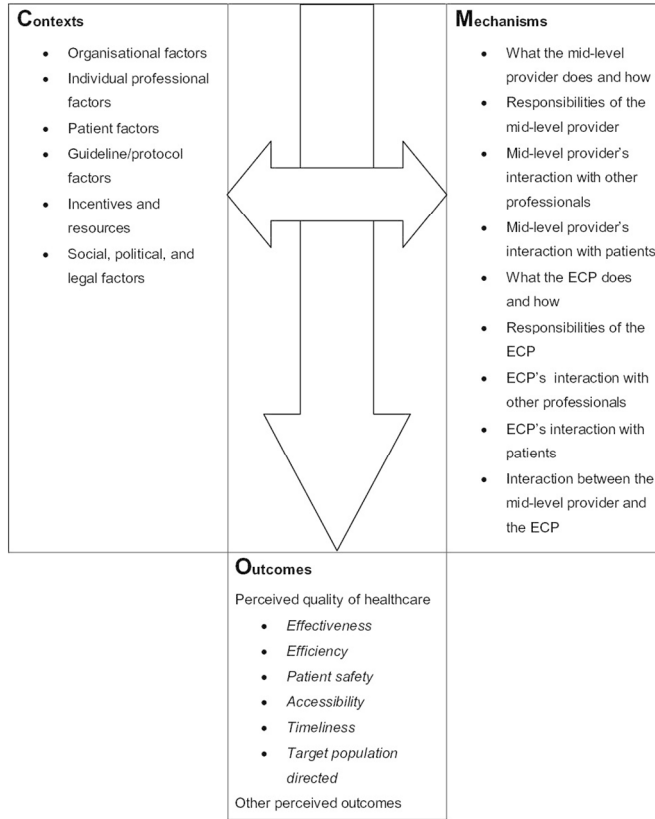

Figure 1 Interpretive framework of substitution of ECPs by mid-level providers  
Figure 1  
209x297mm (150 x 150 DPI)
